# Supplementary material
Source: PubMed Central journal article supplement (PMC7856544)
Supplement: jama-e2026148-s001.pdf [file jama-e2026148-s001.pdf]

## Supplemental Online Content

Moreno-De-Luca A, Millan F, Pesacreta DR, et al. Molecular diagnostic yield of exome sequencing in patients with cerebral palsy. *JAMA*. doi:10.1001/jama.2020.26148

### **DiscovEHR collaboration contributors**

**eMethods.** Exome sequencing and variant calling

**eTable 1.** Clinical laboratory referral cohort pathogenic/likely pathogenic variants

**eTable 2.** Healthcare-based cohort pathogenic/likely pathogenic variants

**eTable 3.** Cross-cohort spectrum of genomic variation

**eReferences**

This supplemental material has been provided by the authors to give readers additional information about their work.

**DiscovEHR collaboration contributors**  
(listed in alphabetical order)

**Geisinger:** Lance J. Adams, Jackie Blank, Dale Bodian, Derek Boris, Adam Buchanan, David J. Carey, Ryan D. Colonie, F. Daniel Davis, Dustin N. Hartzel, Melissa Kelly, H. Lester Kirchner, Joseph B. Leader, David H. Ledbetter, Ph.D., J. Neil Manus, Christa L. Martin, Raghu P. Metpally, Michelle Meyer, Tooraj Mirshahi, Matthew Oetjens, Thomas Nate Person, Christopher Still, Natasha Strande, Amy Sturm, Jen Wagner, Marc Williams.

**Regeneron:** Goncalo Abecasis, Aris Baras, Michael Cantor, Giovanni Coppola, Aris Economides, Luca A. Lotta, John D. Overton, Jeffrey G. Reid, Alan Shuldiner, Christina Beechert, Caitlin Forsythe, Erin D. Fuller, Zhenhua Gu, Michael Lattari, Alexander Lopez, Thomas D. Schleicher, Maria Sotiropoulos Padilla, Karina Toledo, Louis Widom, Sarah E. Wolf, Manasi Pradhan, Kia Manoochchri, Ricardo H. Ulloa, Xiaodong Bai, Suganthi Balasubramanian, Leland Barnard, Andrew Blumenfeld, Gisu Eom, Lukas Habegger, Alicia Hawes, Shareef Khalid, Evan K. Maxwell, Ph.D., William Salerno, Jeffrey C. Staples, Ashish Yadav, Dadong Li, Marcus B. Jones, Lyndon J. Mitnaul

## **eMethods.** Exome sequencing and variant calling

Clinical laboratory referral cohort: Exome sequencing was performed at GeneDx using previously reported protocols.<sup>1</sup> In brief, genomic DNA was extracted from whole blood, oral rinse, or ORAcollect swabs (DNAGenotek, Ontario, Canada) obtained from the proband and any additional submitted family members. Exome sequencing was performed on exon targets isolated by Agilent SureSelect Human All Exon V4 or Clinical Research Exome (Agilent Technologies, Santa Clara, CA) or xGen Exome (IDT, Coralville, IA) capture and sequenced using Illumina HiSeq 2000, 2500, 4000 or NovaSeq 6000 paired-end reads (Illumina, San Diego, CA). DNA sequence was mapped to human genome build UCSC hg19/GRCh37 reference sequence using Burroughs Wheeler Aligner (BWA) with the latest internally validated version at the time of sequencing, progressing from BWA v0.5.8 through BWA-MEM v0.7.8.<sup>2</sup> Variant calls were generated using both SAMtools and Genome Analysis Toolkit (GATK) UnifiedGenotype or HaplotypeCaller, progressing over time from version 0.1.18 to 1.5.0 and 1.5 to 3.7, respectively.<sup>3,4</sup> Copy number variants (CNVs) and mobile element insertions were also called from exome sequencing data using a relative coverage method as described previously.<sup>5,6</sup> Exome sequencing data was analyzed using GeneDx's XomeAnalyzer, a variant annotation, filtering, and analysis platform. Reported variants were confirmed by an appropriate orthogonal method.

Healthcare-based cohort: Exome capture was performed using either NimbleGen SeqCap EZ VCRome (Roche, Basel, Switzerland) or xGen (IDT, Coralville, IA) kits according to the manufacturer's recommended protocol. Multiplexed samples were sequenced on an Illumina v4 HiSeq 2500 (Illumina, San Diego, CA). Raw sequence data were uploaded to the DNAnexus platform for sequence read alignment and variant identification. Reads were aligned to the GRCh38/hg38 reference genome using BWA-MEM.<sup>2</sup> Variants were called separately by VCRome and xGen exome capture. The final VCF was annotated with dbNSFP v3.3a,<sup>7</sup> Variant Effect Predictor (version 96.1) with the LOFTEE plugin,<sup>8</sup> and ClinVar (downloaded January 26, 2018).<sup>9</sup> CNVs were called from exome sequencing using the Copy number estimation using Lattice-Aligned Mixture Models (CLAMMS) algorithm as previously described.<sup>10,11</sup> CNVs called from exome sequencing were orthogonally confirmed with available genotype array data (Illumina Global Screening Array or Illumina OmniExpressExome) using the CNV caller PennCNV.<sup>12</sup> A population MAF in publicly available control databases, such as the genome aggregation database (gnomAD), of <0.001% was used to define rare recessive variants and <0.0005 for rare dominant variants.

**eTable 1.** Clinical laboratory referral cohort pathogenic/likely pathogenic variants

| SNVs ID | Gene            | Ref Seq ID   | Coding DNA change | Protein change | Zygoty | Inh. | Class. | Origin  |
|---------|-----------------|--------------|-------------------|----------------|--------|------|--------|---------|
| 1       | <i>CHRNE</i>    | NM_000080    | c.934_936del      | p.312_312del   | Hom    | AR   | P      | Mat+Pat |
| 1       | <i>AP4E1</i>    | NM_007347    | c.944-1G>C        |                | Hom    | AR   | LP     | Mat+Pat |
| 2       | <i>WWOX</i>     | NM_016373    | c.G1115A          | p.G372E        | Hom    | AR   | P      | Mat+Pat |
| 3       | <i>TBCK</i>     | NM_001163435 | c.C376T           | p.R126X        | Hom    | AR   | P      |         |
| 4       | <i>SLC6A3</i>   | NM_001044    | c.1269+1G>A       |                | Hom    | AR   | P      |         |
| 5       | <i>AP4S1</i>    | NM_007077    | c.294+1G>T        |                | Hom    | AR   | P      | Mat+Pat |
| 6       | <i>ERCC8</i>    | NM_000082    | c.G749T           | p.G250V        | Hom    | AR   | P      | Mat+Pat |
| 7       | <i>NKX6-2</i>   | NM_177400    | c.228delG         | p.L76fs        | Hom    | AR   | LP     | Mat+Pat |
| 8       | <i>AP4M1</i>    | NM_004722    | c.C923G           | p.S308X        | Hom    | AR   | P      | Mat+Pat |
| 9       | <i>FRRS1L</i>   | NM_014334    | c.735_737del      | p.245_246del   | Hom    | AR   | P      |         |
| 10      | <i>ERCC8</i>    | NM_000082    | c.547 C>T         | p.Q183X        | Hom    | AR   | P      | Mat+Pat |
| 11      | <i>ERCC6</i>    | NM_000124    | c.1526+1G>T       |                | Hom    | AR   | LP     | Mat+Pat |
| 12      | <i>DDC</i>      | NM_000790    | c.G1040A          | p.R347Q        | Hom    | AR   | P      |         |
| 13      | <i>EARS2</i>    | NM_001083614 | c.C293T           | p.A98V         | Hom    | AR   | LP     | Mat+Pat |
| 14      | <i>CHMP1A</i>   | NM_002768    | c.C88T            | p.Q30X         | Hom    | AR   | P      | Mat+Pat |
| 15      | <i>SLC1A4</i>   | NM_003038    | c.C1369T          | p.R457W        | Hom    | AR   | LP     | Mat+Pat |
| 16      | <i>SPR</i>      | NM_003124    | c.A448G           | p.R150G        | Hom    | AR   | P      |         |
| 17      | <i>PDHX</i>     | NM_003477    | c.711_712insC     | p.P237fs       | Hom    | AR   | P      | Mat+Pat |
| 18      | <i>SNAP29</i>   | NM_004782    | c.C85T            | p.R29X         | Hom    | AR   | P      | Mat+Pat |
| 19      | <i>MICU1</i>    | NM_006077    | c.C553T           | p.Q185X        | Hom    | AR   | P      | Mat+Pat |
| 20      | <i>STAMPB</i>   | NM_006463    | c.A230G           | p.H77R         | Hom    | AR   | LP     | Mat+Pat |
| 21      | <i>STAMPB</i>   | NM_006463    | c.2844dupA        | p.R38C         | Hom    | AR   | P      | Mat+Pat |
| 22      | <i>RAB3GAP2</i> | NM_012414    | c.2842_2843insA   | p.K948fs       | Hom    | AR   | P      | Mat+Pat |
| 23      | <i>FRRS1L</i>   | NM_014334    | c.735_737del      | p.245_246del   | Hom    | AR   | P      |         |
| 24      | <i>FRRS1L</i>   | NM_014334    | c.735_737del      | p.245_246del   | Hom    | AR   | P      | Mat+Pat |
| 25      | <i>EXOSC3</i>   | NM_016042    | c.A395C           | p.D132A        | Hom    | AR   | P      |         |
| 26      | <i>EXOSC3</i>   | NM_016042    | c.A395C           | p.D132A        | Hom    | AR   | P      | Mat+Pat |
| 27      | <i>EXOSC3</i>   | NM_016042    | c.A395C           | p.D132A        | Hom    | AR   | P      | Mat+Pat |
| 28      | <i>PRUNE1</i>   | NM_021222    | c.C196T           | p.R66X         | Hom    | AR   | P      | Mat+Pat |
| 29      | <i>SIL1</i>     | NM_022464    | c.1030-9G>A       |                | Hom    | AR   | P      |         |

| <b>SNVs ID</b> | <b>Gene</b>     | <b>Ref Seq ID</b> | <b>Coding DNA change</b> | <b>Protein change</b> | <b>Zygoty</b> | <b>Inh.</b> | <b>Class.</b> | <b>Origin</b> |
|----------------|-----------------|-------------------|--------------------------|-----------------------|---------------|-------------|---------------|---------------|
| 30             | <i>RNASEH2B</i> | NM_024570         | c.G529A                  | p.A177T               | Hom           | AR          | P             | Mat+Pat       |
| 31             | <i>RNASEH2B</i> | NM_024570         | c.G529A                  | p.A177T               | Hom           | AR          | P             | Mat+Pat       |
| 32             | <i>MTFMT</i>    | NM_139242         | c.C626T                  | p.S209L               | Hom           | AR          | P             | Mat+Pat       |
| 33             | <i>CYP2U1</i>   | NM_183075         | c.A947T                  | p.D316V               | Hom           | AR          | P             | Mat+Pat       |
| 34             | <i>TSEN54</i>   | NM_207346         | c.G919T                  | p.A307S               | Hom           | AR          | P             | Mat+Pat       |
| 35             | <i>FH</i>       | NM_000143         | c.T1020A                 | p.N340K               | Het           | AR          | LP            | Pat           |
| 35             | <i>FH</i>       | NM_000143         | c.1429_1430insAAA        | p.K477delinsKK        | Het           | AR          | P             | Mat           |
| 36             | <i>FH</i>       | NM_000143         | c.C923G                  | p.A308G               | Het           | AR          | LP            | Mat           |
| 36             | <i>FH</i>       | NM_000143         | c.1429_1430insAAA        | p.K477delinsKK        | Het           | AR          | P             | Pat           |
| 37             | <i>FUCA1</i>    | NM_000147         | c.T393A                  | p.Y131X               | Het           | AR          | P             | Pat           |
| 37             | <i>FUCA1</i>    | NM_000147         | c.G1034A                 | p.G345E               | Het           | AR          | LP            | Mat           |
| 38             | <i>PLOD1</i>    | NM_000302         | c.1097+1G>A              |                       | Het           | AR          | P             |               |
| 38             | <i>PLOD1</i>    | NM_000302         | c.C583T                  | p.Q195X               | Het           | AR          | P             |               |
| 39             | <i>RPE65</i>    | NM_000329         | c.C1244T                 | p.A415V               | Het           | AR          | LP            | Mat           |
| 39             | <i>RPE65</i>    | NM_000329         | c.C271T                  | p.R91W                | Het           | AR          | P             | Pat           |
| 39             | <i>SPATA5</i>   | NM_145207         | c.G251A                  | p.R84Q                | Het           | AR          | P             | Pat           |
| 39             | <i>SPATA5</i>   | NM_145207         | c.G1877C                 | p.W626S               | Het           | AR          | LP            | Mat           |
| 40             | <i>ALDH3A2</i>  | NM_000382         | c.342delC                | p.P114fs              | Het           | AR          | P             | Mat           |
| 40             | <i>ALDH3A2</i>  | NM_000382         | c.G1268A                 | p.R423H               | Het           | AR          | P             | Pat           |
| 41             | <i>TPP1</i>     | NM_000391         | c.C1058A                 | p.T353N               | Het           | AR          | LP            | Mat           |
| 41             | <i>TPP1</i>     | NM_000391         | c.C1015T                 | p.R339W               | Het           | AR          | LP            |               |
| 42             | <i>ADAR</i>     | NM_001111         | c.G3019A                 | p.G1007R              | Het           | AR          | P             | Pat           |
| 42             | <i>ADAR</i>     | NM_001111         | c.C577G                  | p.P193A               | Het           | AR          | P             | Mat           |
| 43             | <i>ADAR</i>     | NM_001111         | c.C577G                  | p.P193A               | Het           | AR          | P             | Mat           |
| 43             | <i>ADAR</i>     | NM_001111         | c.3020-3C>G              |                       | Het           | AR          | LP            | Pat           |
| 44             | <i>ADAR</i>     | NM_001111         | c.C3286T                 | p.R1096X              | Het           | AR          | P             | Mat           |
| 44             | <i>ADAR</i>     | NM_001111         | c.C577G                  | p.P193A               | Het           | AR          | P             | Pat           |
| 45             | <i>ADAR</i>     | NM_001111         | c.G3577A                 | p.E1193K              | Het           | AR          | LP            | Mat           |
| 45             | <i>ADAR</i>     | NM_001111         | c.1491_1492del           | p.497_498del          | Het           | AR          | P             | Pat           |
| 46             | <i>POLG</i>     | NM_002693         | c.G2243C                 | p.W748S               | Het           | AR          | P             | Pat           |
| 46             | <i>POLG</i>     | NM_002693         | c.3006_3049del           | p.1002_1017del        | Het           | AR          | P             | Mat           |
| 47             | <i>ATP6V0A4</i> | NM_020632         | c.C334T                  | p.Q112X               | Het           | AR          | P             |               |

| SNVs ID | Gene     | Ref Seq ID | Coding DNA change | Protein change | Zygoty | Inh. | Class. | Origin  |
|---------|----------|------------|-------------------|----------------|--------|------|--------|---------|
| 47      | ATP6V0A4 | NM_020632  | c.G1231T          | p.D411Y        | Het    | AR   | LP     |         |
| 48      | PLA2G6   | NM_003560  | c.G1799A          | p.R600Q        | Het    | AR   | P      |         |
| 48      | PLA2G6   | NM_003560  | c.T386C           | p.L129P        | Het    | AR   | LP     |         |
| 49      | ECHS1    | NM_004092  | c.A476G           | p.Q159R        | Het    | AR   | LP     |         |
| 49      | ECHS1    | NM_004092  | c.C5T             | p.A2V          | Het    | AR   | P      |         |
| 50      | AP4M1    | NM_004722  | c.842_843del      | p.281_281del   | Het    | AR   | P      | Mat     |
| 50      | AP4M1    | NM_004722  | c.218_219insA     | p.N73fs        | Het    | AR   | P      | Pat     |
| 51      | PEX16    | NM_004813  | c.C679T           | p.R227W        | Het    | AR   | LP     | Mat     |
| 51      | PEX16    | NM_004813  | c.954_956del      | p.318_319del   | Het    | AR   | LP     | Pat     |
| 52      | MICU1    | NM_006077  | c.G386C           | p.R129P        | Het    | AR   | LP     | Mat     |
| 52      | MICU1    | NM_006077  | c.C355T           | p.R119X        | Het    | AR   | P      | De Novo |
| 53      | RAB3GAP1 | NM_012233  | c.2417delA        | p.K806fs       | Het    | AR   | P      | Mat     |
| 53      | RAB3GAP1 | NM_012233  | c.2942_2943insT   | p.F981fs       | Het    | AR   | P      |         |
| 54      | RAB3GAP1 | NM_012233  | c.2343_2347del    | p.781_783del   | Het    | AR   | P      | Mat     |
| 54      | RAB3GAP1 | NM_012233  | c.2644delG        | p.V882fs       | Het    | AR   | P      | Pat     |
| 55      | EIF2B2   | NM_014239  | c.G599T           | p.G200V        | Het    | AR   | P      | Mat     |
| 55      | EIF2B2   | NM_014239  | c.G3T             | p.M1I          | Het    | AR   | P      | Pat     |
| 56      | OTUD6B   | NM_016023  | c.C433T           | p.R145X        | Het    | AR   | P      | Mat     |
| 56      | OTUD6B   | NM_016023  | c.887+1G>A        |                | Het    | AR   | P      | Pat     |
| 57      | SEPSECS  | NM_016955  | c.388+3A>G        |                | Het    | AR   | LP     | Pat     |
| 57      | SEPSECS  | NM_016955  | c.805-1->G        |                | Het    | AR   | P      | Mat     |
| 58      | POMGNT1  | NM_017739  | c.C931T           | p.R311X        | Het    | AR   | P      |         |
| 58      | POMGNT1  | NM_017739  | c.603_604insT     | p.G201fs       | Het    | AR   | P      |         |
| 59      | PIGV     | NM_017837  | c.A614G           | p.N205S        | Het    | AR   | LP     | Pat     |
| 59      | PIGV     | NM_017837  | c.G467A           | p.C156Y        | Het    | AR   | LP     | Mat     |
| 60      | NGLY1    | NM_018297  | c.881+5G>T        |                | Het    | AR   | LP     | Pat     |
| 60      | NGLY1    | NM_018297  | c.C347G           | p.S116X        | Het    | AR   | P      | Mat     |
| 61      | NGLY1    | NM_018297  | c.1567_1568insA   | p.K523fs       | Het    | AR   | P      | Mat     |
| 61      | NGLY1    | NM_018297  | c.C1624T          | p.R542X        | Het    | AR   | P      |         |
| 62      | NGLY1    | NM_018297  | c.C930T           | p.G310G        | Het    | AR   | LP     | Mat     |
| 62      | NGLY1    | NM_018297  | c.C622T           | p.Q208X        | Het    | AR   | P      | Pat     |
| 63      | HACE1    | NM_020771  | c.C1990T          | p.R664X        | Het    | AR   | P      | De Novo |

| SNVs ID | Gene            | Ref Seq ID | Coding DNA change                   | Protein change | Zygoty | Inh. | Class. | Origin |
|---------|-----------------|------------|-------------------------------------|----------------|--------|------|--------|--------|
| 63      | <i>HACE1</i>    | NM_020771  | c.1865-2A>G                         |                | Het    | AR   | LP     | Mat    |
| 64      | <i>PNKP</i>     | NM_007254  | c.1250_1251insAACGG<br>GTCGCCATCGAC | p.K417fs       | Het    | AR   | P      | Mat    |
| 64      | <i>PNKP</i>     | NM_007254  | c.1376_1378del                      | p.459_460del   | Het    | AR   | LP     | Pat    |
| 65      | <i>EPG5</i>     | NM_020964  | c.5943-11TTCTT>-                    |                | Het    | AR   | LP     | Pat    |
| 65      | <i>EPG5</i>     | NM_020964  | c.G772T                             | p.E258X        | Het    | AR   | P      | Mat    |
| 66      | <i>C5orf42</i>  | NM_023073  | c.C1270T                            | p.R424X        | Het    | AR   | P      | Mat    |
| 66      | <i>C5orf42</i>  | NM_023073  | c.C9058T                            | p.R3020X       | Het    | AR   | P      |        |
| 67      | <i>FA2H</i>     | NM_024306  | c.A782G                             | p.H261R        | Het    | AR   | LP     | Mat    |
| 67      | <i>FA2H</i>     | NM_024306  | c.G139A                             | p.E47K         | Het    | AR   | LP     | Pat    |
| 68      | <i>RNASEH2B</i> | NM_024570  | c.245-8A>G                          |                | Het    | AR   | LP     | Pat    |
| 68      | <i>RNASEH2B</i> | NM_024570  | c.G529A                             | p.A177T        | Het    | AR   | P      | Mat    |
| 69      | <i>UBA5</i>     | NM_024818  | c.G1111A                            | p.A371T        | Het    | AR   | P      | Pat    |
| 69      | <i>UBA5</i>     | NM_024818  | c.844_845insT                       | p.Y282fs       | Het    | AR   | P      | Mat    |
| 70      | <i>PGAP1</i>    | NM_024989  | c.G1245A                            | p.W415X        | Het    | AR   | LP     | Pat    |
| 70      | <i>PGAP1</i>    | NM_024989  | c.2358_2359insTA                    | p.R786fs       | Het    | AR   | LP     | Mat    |
| 71      | <i>TOE1</i>     | NM_025077  | c.G219C                             | p.R73S         | Het    | AR   | LP     | Pat    |
| 71      | <i>TOE1</i>     | NM_025077  | c.G733T                             | p.E245X        | Het    | AR   | P      | Mat    |
| 72      | <i>CTC1</i>     | NM_025099  | c.A1459G                            | p.R487G        | Het    | AR   | LP     | Mat    |
| 72      | <i>CTC1</i>     | NM_025099  | c.722_725del                        | p.241_242del   | Het    | AR   | P      | Pat    |
| 73      | <i>SPG11</i>    | NM_025137  | c.2264delA                          | p.Q755fs       | Het    | AR   | P      | Mat    |
| 73      | <i>SPG11</i>    | NM_025137  | c.G1085A                            | p.W362X        | Het    | AR   | P      | Pat    |
| 74      | <i>LIPH</i>     | NM_139248  | c.C328T                             | p.R110X        | Het    | AR   | P      |        |
| 74      | <i>LIPH</i>     | NM_139248  | c.789delC                           | p.C263X        | Het    | AR   | P      | Mat    |
| 75      | <i>SPATA5</i>   | NM_145207  | c.A1C                               | p.M1L          | Het    | AR   | P      | Mat    |
| 75      | <i>SPATA5</i>   | NM_145207  | c.G251A                             | p.R84Q         | Het    | AR   | P      | Pat    |
| 76      | <i>SPATA5</i>   | NM_145207  | c.G2351A                            | p.R784Q        | Het    | AR   | LP     | Mat    |
| 76      | <i>SPATA5</i>   | NM_145207  | c.G269T                             | p.S90I         | Het    | AR   | LP     | Pat    |
| 77      | <i>SPATA5</i>   | NM_145207  | c.A1883G                            | p.D628G        | Het    | AR   | LP     |        |
| 77      | <i>SPATA5</i>   | NM_145207  | c.1714+1G>A                         |                | Het    | AR   | P      |        |
| 78      | <i>KCTD7</i>    | NM_153033  | c.G362T                             | p.R121L        | Het    | AR   | LP     | Pat    |
| 78      | <i>KCTD7</i>    | NM_153033  | c.G704C                             | p.W235S        | Het    | AR   | LP     | Mat    |

| SNVs ID | Gene            | Ref Seq ID   | Coding DNA change                   | Protein change             | Zygoty | Inh. | Class. | Origin         |
|---------|-----------------|--------------|-------------------------------------|----------------------------|--------|------|--------|----------------|
| 79      | <i>PIGN</i>     | NM_176787    | c.T2411A                            | p.I804K                    | Het    | AR   | LP     | Pat            |
| 79      | <i>PIGN</i>     | NM_176787    | c.G709A                             | p.G237R                    | Het    | AR   | LP     | Mat            |
| 80      | <i>PIGN</i>     | NM_176787    | c.C2679G                            | p.S893R                    | Het    | AR   | LP     | Pat            |
| 80      | <i>PIGN</i>     | NM_176787    | c.C283T                             | p.R95W                     | Het    | AR   | LP     | Mat            |
| 81      | <i>SUMF1</i>    | NM_182760    | c.G1034A                            | p.R345H                    | Het    | AR   | LP     | Pat            |
| 81      | <i>SUMF1</i>    | NM_182760    | c.T463C                             | p.S155P                    | Het    | AR   | P      | Mat            |
| 82      | <i>MOCS2</i>    | NM_004531    | c.538_539del                        | p.180_180del               | Het    | AR   | LP     | Pat            |
| 82      | <i>MOCS2</i>    | NM_004531    | c.T493C                             | p.W165R                    | Het    | AR   | LP     | Mat            |
| 83      | <i>AP4S1</i>    | NM_007077    | c.C31T                              | p.Q11X                     | Het    | AR   | P      | Pat            |
| 84      | <i>TELO2</i>    | NM_016111    | c.G1826A                            | p.R609H                    | Het    | AR   | LP     | Pat            |
| 85      | <i>PRUNE1</i>   | NM_021222    | c.T809C                             | p.L270P                    | Het    | AR   | LP     | Mat            |
| 86      | <i>TRAPPC9</i>  | NM_031466    | c.C1708T                            | p.R570X                    | Het    | AR   | P      | Pat            |
| 87      | <i>FARS2</i>    | NM_006567    | c.C1082T                            | p.P361L                    | Het    | AR   | LP     | Pat            |
| 88      | <i>SACS</i>     | NM_014363    | c.C7273T                            | p.R2425X                   | Het    | AR   | P      | Mat            |
| 95      | <i>ARSE</i>     | NM_000047    | c.G1387A                            | p.A463T                    | Hemi   | XL   | LP     | Mat            |
| 96      | <i>ATP7A</i>    | NM_000052    | c.1707+6TAAG>-                      |                            | Hemi   | XL   | P      | <i>De Novo</i> |
| 97      | <i>IDS</i>      | NM_000202    | c.A806T                             | p.D269V                    | Hemi   | XL   | LP     | Mat            |
| 98      | <i>PDHA1</i>    | NM_000284    | c.C483T                             | p.Y161Y                    | Het    | XL   | LP     |                |
| 99      | <i>PDHA1</i>    | NM_000284    | c.T785G                             | p.V262G                    | Het    | XL   | LP     | <i>De Novo</i> |
| 100     | <i>L1CAM</i>    | NM_000425    | c.2916_2917del                      | p.972_973del               | Hemi   | XL   | P      |                |
| 101     | <i>ATRX</i>     | NM_000489    | c.A4509T                            | p.R1503S                   | Het    | XL   | LP     | <i>De Novo</i> |
| 102     | <i>ATRX</i>     | NM_000489    | c.C569T                             | p.P190L                    | Hemi   | XL   | LP     | Mat            |
| 103     | <i>PLP1</i>     | NM_000533    | c.191+1G>T                          |                            | Hemi   | XL   | P      | Mat            |
| 104     | <i>KIAA2022</i> | NM_001008537 | c.2420_2421insTTACCT<br>GTTACTAATGT | p.I807_P808delins<br>ITCYX | Het    | XL   | P      | <i>De Novo</i> |
| 105     | <i>USP9X</i>    | NM_001039590 | c.G1374A                            | p.W458X                    | Het    | XL   | P      | <i>De Novo</i> |
| 106     | <i>G6PD</i>     | NM_001042351 | c.G1003A                            | p.A335T                    | Hemi   | XL   | LP     | Mat            |
| 107     | <i>IQSEC2</i>   | NM_001111125 | c.C880T                             | p.Q294X                    | Hemi   | XL   | P      | <i>De Novo</i> |
| 108     | <i>IQSEC2</i>   | NM_001111125 | c.C424T                             | p.Q142X                    | Hemi   | XL   | P      | <i>De Novo</i> |
| 109     | <i>BCAP31</i>   | NM_001139441 | c.306_307del                        | p.102_103del               | Hemi   | XL   | P      | Mat            |
| 110     | <i>DDX3X</i>    | NM_001193416 | c.1498-2A>G                         |                            | Het    | XL   | P      | <i>De Novo</i> |
| 111     | <i>DDX3X</i>    | NM_001193416 | c.C1513G                            | p.L505V                    | Het    | XL   | LP     | <i>De Novo</i> |



| <b>SNVs ID</b> | <b>Gene</b>    | <b>Ref Seq ID</b> | <b>Coding DNA change</b> | <b>Protein change</b> | <b>Zygoty</b> | <b>Inh.</b> | <b>Class.</b> | <b>Origin</b>  |
|----------------|----------------|-------------------|--------------------------|-----------------------|---------------|-------------|---------------|----------------|
| 112            | <i>DDX3X</i>   | NM_001193416      | c.641delT                | p.I214fs              | Het           | XL          | P             | <i>De Novo</i> |
| 113            | <i>DDX3X</i>   | NM_001193416      | c.C1595T                 | p.T532M               | Het           | XL          | LP            | <i>De Novo</i> |
| 114            | <i>DDX3X</i>   | NM_001193416      | c.544-1G>T               |                       | Het           | XL          | P             | <i>De Novo</i> |
| 115            | <i>DDX3X</i>   | NM_001193416      | c.G977A                  | p.R326H               | Het           | XL          | P             | <i>De Novo</i> |
| 116            | <i>DKC1</i>    | NM_001363         | c.G1133A                 | p.R378Q               | Hemi          | XL          | P             | <i>De Novo</i> |
| 117            | <i>OPHN1</i>   | NM_002547         | c.462_465del             | p.154_155del          | Hemi          | XL          | P             | <i>De Novo</i> |
| 118            | <i>PIGA</i>    | NM_002641         | c.G145A                  | p.V49M                | Hemi          | XL          | LP            | Mat            |
| 119            | <i>CDKL5</i>   | NM_003159         | c.C1675T                 | p.R559X               | Mosaic        | XL          | P             | <i>De Novo</i> |
| 120            | <i>NAA10</i>   | NM_003491         | c.T440C                  | p.M147T               | Het           | XL          | P             | <i>De Novo</i> |
| 121            | <i>NAA10</i>   | NM_003491         | c.T384G                  | p.F128L               | Het           | XL          | P             | <i>De Novo</i> |
| 122            | <i>NAA10</i>   | NM_003491         | c.C346T                  | p.R116W               | Het           | XL          | P             |                |
| 123            | <i>CUL4B</i>   | NM_003588         | c.412_420del             | p.138_140del          | Hemi          | XL          | LP            |                |
| 124            | <i>CASK</i>    | NM_003688         | c.C1480T                 | p.Q494X               | Het           | XL          | P             | <i>De Novo</i> |
| 125            | <i>CASK</i>    | NM_003688         | c.C1915T                 | p.R639X               | Het           | XL          | P             | <i>De Novo</i> |
| 126            | <i>CASK</i>    | NM_003688         | c.553_565del             | p.185_189del          | Het           | XL          | P             |                |
| 127            | <i>CASK</i>    | NM_003688         | c.C82T                   | p.R28X                | Het           | XL          | P             | <i>De Novo</i> |
| 128            | <i>AP1S2</i>   | NM_003916         | c.92delC                 | p.T31fs               | Hemi          | XL          | P             |                |
| 129            | <i>KDM5C</i>   | NM_004187         | c.2982-1G>C              |                       | Hemi          | XL          | P             | Mat            |
| 130            | <i>TAF1</i>    | NM_004606         | c.C2954T                 | p.S985F               | Hemi          | XL          | LP            | <i>De Novo</i> |
| 131            | <i>TAF1</i>    | NM_004606         | c.C488T                  | p.P163L               | Mosaic        | XL          | LP            | <i>De Novo</i> |
| 132            | <i>MECP2</i>   | NM_004992         | c.C808T                  | p.R270X               | Het           | XL          | P             | <i>De Novo</i> |
| 133            | <i>MECP2</i>   | NM_004992         | c.C925T                  | p.R309W               | Hemi          | XL          | P             | Mat,<br>mosaic |
| 134            | <i>MECP2</i>   | NM_004992         | c.1006_1013del           | p.336_338del          | Het           | XL          | P             |                |
| 135            | <i>MECP2</i>   | NM_004992         | c.A403G                  | p.K135E               | Hemi          | XL          | P             | <i>De Novo</i> |
| 136            | <i>MED12</i>   | NM_005120         | c.3868-7T>A              |                       | Het           | XL          | LP            | <i>De Novo</i> |
| 137            | <i>SLC16A2</i> | NM_006517         | c.1414delT               | p.C472fs              | Hemi          | XL          | LP            | Mat            |
| 137            | <i>MYO7A</i>   | NM_000260         | c.C5095T                 | p.Q1699X              | Het           | AD or<br>AR | LP            | Mat            |
| 137            | <i>MYO7A</i>   | NM_000260         | c.G6487A                 | p.G2163S              | Het           | AD or<br>AR | P             | Pat            |
| 138            | <i>SLC16A2</i> | NM_006517         | c.G623A                  | p.G208D               | Hemi          | XL          | LP            | Mat            |
| 139            | <i>WDR45</i>   | NM_007075         | c.747_749del             | p.249_250del          | Hemi          | XL          | LP            | <i>De Novo</i> |

| <b>SNVs ID</b> | <b>Gene</b>    | <b>Ref Seq ID</b> | <b>Coding DNA change</b>        | <b>Protein change</b> | <b>Zygoty</b> | <b>Inh.</b> | <b>Class.</b> | <b>Origin</b>  |
|----------------|----------------|-------------------|---------------------------------|-----------------------|---------------|-------------|---------------|----------------|
| 140            | <i>WDR45</i>   | NM_007075         | c.793delT                       | p.F265fs              | Het           | XL          | P             | <i>De Novo</i> |
| 141            | <i>WDR45</i>   | NM_007075         | c.158_160del                    | p.53_54del            | Hemi          | XL          | LP            | Mat,<br>mosaic |
| 142            | <i>WDR45</i>   | NM_007075         | c.G503A                         | p.G168E               | Hemi          | XL          | LP            | <i>De Novo</i> |
| 143            | <i>HDAC8</i>   | NM_018486         | c.G419T                         | p.G140V               | Het           | XL          | LP            | <i>De Novo</i> |
| 144            | <i>ZC4H2</i>   | NM_018684         | c.G200A                         | p.R67Q                | Hemi          | XL          | LP            | <i>De Novo</i> |
| 145            | <i>ZC4H2</i>   | NM_018684         | c.225+5G>C                      |                       | Het           | XL          | LP            | <i>De Novo</i> |
| 146            | <i>HNRNPH2</i> | NM_019597         | c.C616T                         | p.R206W               | Het           | XL          | P             | <i>De Novo</i> |
| 147            | <i>UPF3B</i>   | NM_080632         | c.387_388insT                   | p.A129fs              | Hemi          | XL          | P             | Mat            |
| 148            | <i>ARX</i>     | NM_139058         | c.C1135T                        | p.R379C               | Hemi          | XL          | LP            | <i>De Novo</i> |
| 149            | <i>ARX</i>     | NM_139058         | c.423_472del                    | p.141_158del          | Het           | XL          | P             | <i>De Novo</i> |
| 150            | <i>ZDHHC9</i>  | NM_016032         | c.777+1 G>A                     |                       | Hemi          | XL          | P             | Mat            |
| 151            | <i>MECP2</i>   | NM_001110792      | c.32_33insGAGGAGGA<br>GGAGGAGGC | p.G11fs               | Het           | XL          | P             | <i>De Novo</i> |
| 152            | <i>ZEB2</i>    | NM_014795         | c.855_856insA                   | p.T285fs              | Het           | AD          | P             |                |
| 153            | <i>STXBP1</i>  | NM_003165         | c.G1549T                        | p.A517S               | Mosaic        | AD          | LP            | <i>De Novo</i> |
| 153            | <i>ASXL3</i>   | NM_030632         | c.4022_4023del                  | p.1341_1341del        | Het           | AD          | P             | <i>De Novo</i> |
| 154            | <i>CTNNB1</i>  | NM_001904         | c.2041_2042insAGCT              | p.S681_L682delinsX    | Het           | AD          | P             | GM             |
| 155            | <i>TUBB2B</i>  | NM_178012         | c.C533T                         | p.T178M               | Het           | AD          | P             | <i>De Novo</i> |
| 156            | <i>KCNQ2</i>   | NM_172107         | c.G629C                         | p.R210P               | Het           | AD          | P             |                |
| 157            | <i>KCNQ2</i>   | NM_172107         | c.G657C                         | p.K219N               | Het           | AD          | LP            | <i>De Novo</i> |
| 158            | <i>ATP1A3</i>  | NM_152296         | c.G2328C                        | p.E776D               | Het           | AD          | LP            | <i>De Novo</i> |
| 159            | <i>ATP1A3</i>  | NM_152296         | c.2145_2147del                  | p.715_716del          | Het           | AD          | LP            | <i>De Novo</i> |
| 160            | <i>ATP1A3</i>  | NM_152296         | c.C2324T                        | p.P775L               | Het           | AD          | P             |                |
| 161            | <i>STAT3</i>   | NM_139276         | c.C2144T                        | p.P715L               | Het           | AD          | P             | <i>De Novo</i> |
| 162            | <i>UBE3A</i>   | NM_130838         | c.A1420G                        | p.N474D               | Het           | AD          | LP            | <i>De Novo</i> |
| 163            | <i>UBE3A</i>   | NM_130838         | c.2176_2178del                  | p.726_726del          | Het           | AD          | LP            | Mat            |
| 164            | <i>TREX1</i>   | NM_033629         | c.G52A                          | p.D18N                | Het           | AD          | P             | Pat            |
| 165            | <i>SON</i>     | NM_032195         | c.5753_5756del                  | p.1918_1919del        | Het           | AD          | P             |                |
| 166            | <i>EHMT1</i>   | NM_024757         | c.C2704T                        | p.R902X               | Mosaic        | AD          | P             | <i>De Novo</i> |
| 167            | <i>TBL1XR1</i> | NM_024665         | c.325_342del                    | p.109_114del          | Het           | AD          | LP            | <i>De Novo</i> |
| 168            | <i>TBL1XR1</i> | NM_024665         | c.T857G                         | p.V286G               | Het           | AD          | LP            | <i>De Novo</i> |
| 169            | <i>PIZO2</i>   | NM_022068         | c.G8057A                        | p.R2686H              | Het           | AD          | P             | Mat            |

| <b>SNVs ID</b> | <b>Gene</b>    | <b>Ref Seq ID</b> | <b>Coding DNA change</b> | <b>Protein change</b> | <b>Zygoty</b> | <b>Inh.</b> | <b>Class.</b> | <b>Origin</b>  |
|----------------|----------------|-------------------|--------------------------|-----------------------|---------------|-------------|---------------|----------------|
| 170            | <i>GABRB2</i>  | NM_021911         | c.T735A                  | p.F245L               | Het           | AD          | LP            | <i>De Novo</i> |
| 171            | <i>GNAO1</i>   | NM_020988         | c.C625T                  | p.R209C               | Het           | AD          | P             | <i>De Novo</i> |
| 172            | <i>KCNT1</i>   | NM_020822         | c.G1283A                 | p.R428Q               | Het           | AD          | P             | <i>De Novo</i> |
| 173            | <i>HECW2</i>   | NM_020760         | c.G3572A                 | p.R1191Q              | Het           | AD          | P             | <i>De Novo</i> |
| 174            | <i>ARID1B</i>  | NM_020732         | c.2201_2202insG          | p.G734fs              | Het           | AD          | P             | <i>De Novo</i> |
| 175            | <i>CACNA1G</i> | NM_018896         | c.T623C                  | p.L208P               | Het           | AD          | LP            | <i>De Novo</i> |
| 176            | <i>WAC</i>     | NM_016628         | c.1171_1172insA          | p.T391fs              | Het           | AD          | P             | <i>De Novo</i> |
| 177            | <i>AUTS2</i>   | NM_015570         | c.1297_1300CCT           |                       | Het           | AD          | P             | <i>De Novo</i> |
| 178            | <i>OPA1</i>    | NM_015560         | c.G1334A                 | p.R445H               | Het           | AD          | P             | Mat            |
| 179            | <i>ASXL1</i>   | NM_015338         | c.2417_2418insAC         | p.T806fs              | Het           | AD          | P             | <i>De Novo</i> |
| 180            | <i>CAMTA1</i>  | NM_015215         | c.838delA                | p.S280fs              | Het           | AD          | LP            | Mat            |
| 181            | <i>POGZ</i>    | NM_015100         | c.2518_2519del           | p.840_840del          | Het           | AD          | P             | <i>De Novo</i> |
| 182            | <i>SPAST</i>   | NM_014946         | c.A1459C                 | p.N487H               | Het           | AD          | P             | <i>De Novo</i> |
| 183            | <i>MFN2</i>    | NM_014874         | c.C310T                  | p.R104W               | Het           | AD          | P             | Pat            |
| 184            | <i>KMT2B</i>   | NM_014727         | c.3325delC               | p.R1109fs             | Het           | AD          | LP            | Mat            |
| 185            | <i>SHOC2</i>   | NM_007373         | c.A4G                    | p.S2G                 | Het           | AD          | P             | <i>De Novo</i> |
| 186            | <i>CALM1</i>   | NM_006888         | c.A419T                  | p.E140V               | Het           | AD          | LP            | <i>De Novo</i> |
| 187            | <i>SYNGAP1</i> | NM_006772         | c.1345_1346insA          | p.S449fs              | Het           | AD          | P             | <i>De Novo</i> |
| 188            | <i>SYNGAP1</i> | NM_006772         | c.1677-2AGCGTGTTC>-      |                       | Het           | AD          | P             | <i>De Novo</i> |
| 189            | <i>SLC2A1</i>  | NM_006516         | c.G1036C                 | p.G346R               | Het           | AD          | LP            | <i>De Novo</i> |
| 190            | <i>TUBB4A</i>  | NM_006087         | c.A1162G                 | p.M388V               | Het           | AD          | LP            |                |
| 191            | <i>TUBB4A</i>  | NM_006087         | c.G763A                  | p.V255I               | Het           | AD          | P             | <i>De Novo</i> |
| 192            | <i>TUBB4A</i>  | NM_006087         | c.C544A                  | p.P182T               | Het           | AD          | LP            |                |
| 193            | <i>TUBA1A</i>  | NM_006009         | c.G1246A                 | p.G416S               | Het           | AD          | LP            | <i>De Novo</i> |
| 194            | <i>FOXP1</i>   | NM_005249         | c.256delC                | p.Q86fs               | Het           | AD          | P             | <i>De Novo</i> |
| 195            | <i>CREBBP</i>  | NM_004380         | c.A5614G                 | p.M1872V              | Het           | AD          | P             | <i>De Novo</i> |
| 196            | <i>KIF1A</i>   | NM_004321         | c.C646T                  | p.R216C               | Het           | AD          | P             | <i>De Novo</i> |
| 197            | <i>KIF1A</i>   | NM_004321         | c.C946T                  | p.R316W               | Het           | AD          | P             |                |
| 198            | <i>KIF1A</i>   | NM_004321         | c.A308C                  | p.K103T               | Het           | AD          | P             | <i>De Novo</i> |
| 199            | <i>STXBP1</i>  | NM_003165         | c.G1652A                 | p.R551H               | Het           | AD          | P             | <i>De Novo</i> |
| 200            | <i>SMARCB1</i> | NM_003073         | c.G110A                  | p.R37H                | Het           | AD          | P             | <i>De Novo</i> |
| 201            | <i>GNB1</i>    | NM_002074         | c.T239C                  | p.I80T                | Het           | AD          | P             | <i>De Novo</i> |

| SNVs ID | Gene    | Ref Seq ID   | Coding DNA change | Protein change | Zygoty | Inh. | Class. | Origin      |
|---------|---------|--------------|-------------------|----------------|--------|------|--------|-------------|
| 202     | CTNNB1  | NM_001904    | c.1249_1250insG   | p.V417fs       | Het    | AD   | P      | De Novo     |
| 203     | CTNNB1  | NM_001904    | c.2229_2230insAC  | p.H743fs       | Het    | AD   | P      | De Novo     |
| 204     | COL4A1  | NM_001845    | c.2373_2383del    | p.791_795del   | Het    | AD   | P      | Pat         |
| 205     | ACTG1   | NM_001614    | c.A863G           | p.D288G        | Het    | AD   | LP     | De Novo     |
| 206     | DYRK1A  | NM_001396    | c.665-9CTCTT>-    |                | Het    | AD   | LP     |             |
| 207     | DYNC1H1 | NM_001376    | c.G4868A          | p.R1623Q       | Het    | AD   | LP     | De Novo     |
| 208     | DYNC1H1 | NM_001376    | c.G11222A         | p.R3741H       | Het    | AD   | LP     | De Novo     |
| 209     | DYNC1H1 | NM_001376    | c.C3370T          | p.H1124Y       | Het    | AD   | P      | De Novo     |
| 210     | CHD8    | NM_001170629 | c.4817+2T>A       |                | Het    | AD   | LP     |             |
| 211     | SCN1A   | NM_001165963 | c.C4547A          | p.S1516X       | Het    | AD   | P      | Pat, mosaic |
| 212     | CACNA1A | NM_001127221 | c.2042_2043del    | p.681_681del   | Het    | AD   | P      |             |
| 213     | AHDC1   | NM_001029882 | c.2527_2543del    | p.843_848del   | Het    | AD   | P      | De Novo     |
| 218     | UBE3A   | NM_130838    | c.1646_1648del    | p.549_550del   | Het    | AD   | P      | De Novo     |
| 219     | FGFR1   | NM_023110    | c.1599_1601del    | p.533_534del   | Het    | AD   | P      | Mat         |
| 220     | KCNT1   | NM_020822    | c.G2849A          | p.R950Q        | Het    | AD   | LP     | Mat         |
| 221     | MBD5    | NM_018328    | c.3699_3700insT   | p.N1233fs      | Het    | AD   | P      | De Novo     |
| 222     | PIK3CD  | NM_005026    | c.A3074G          | p.E1025G       | Het    | AD   | LP     | De Novo     |
| 223     | CTNNB1  | NM_001904    | c.1354delC        | p.L452fs       | Het    | AD   | P      | De Novo     |
| 224     | GRIN2B  | NM_000834    | c.G3332A          | p.R1111H       | Het    | AD   | P      | De Novo     |
| 225     | BCL11A  | NM_022893    | c.1079_1080insC   | p.L360fs       | Het    | AD   | P      | De Novo     |
| 226     | PPM1D   | NM_003620    | c.C1210T          | p.Q404X        | Het    | AD   | P      | De Novo     |
| 227     | FBN2    | NM_001999    | c.4594delG        | p.D1532fs      | Het    | AD   | LP     |             |
| 228     | CDC42   | NM_001791    | c.A191G           | p.Y64C         | Het    | AD   | P      | De Novo     |
| 229     | EP300   | NM_001429    | c.C4879G          | p.R1627G       | Het    | AD   | LP     | De Novo     |
| 230     | CTBP1   | NM_001328    | c.C1024T          | p.R342W        | Het    | AD   | P      | De Novo     |
| 231     | FGD1    | NM_004463    | c.562_569del      | p.188_190del   | Hemi   | XL   | P      | De Novo     |
| 232     | CTNNB1  | NM_001904    | c.A841T           | p.K281X        | Het    | AD   | P      | De Novo     |
| 233     | COL4A1  | NM_001845    | c.G3371A          | p.G1124E       | Het    | AD   | LP     |             |
| 234     | NKX2-1  | NM_001079668 | c.G728A           | p.R243H        | Het    | AD   | LP     | Pat         |
| 235     | ARID2   | NM_152641    | c.2536delG        | p.V846fs       | Het    | AD   | P      | De Novo     |
| 236     | HECW2   | NM_020760    | c.A4334G          | p.E1445G       | Het    | AD   | LP     | De Novo     |
| 237     | SATB2   | NM_015265    | c.1943_1944insT   | p.L648fs       | Het    | AD   | P      | De Novo     |

| <b>SNVs ID</b> | <b>Gene</b>     | <b>Ref Seq ID</b> | <b>Coding DNA change</b> | <b>Protein change</b> | <b>Zygoty</b> | <b>Inh.</b> | <b>Class.</b> | <b>Origin</b>  |
|----------------|-----------------|-------------------|--------------------------|-----------------------|---------------|-------------|---------------|----------------|
| 238            | <i>POGZ</i>     | NM_015100         | c.G2450A                 | p.C817Y               | Het           | AD          | LP            | <i>De Novo</i> |
| 239            | <i>HIST1H1E</i> | NM_005321         | c.454_455insT            | p.K152fs              | Het           | AD          | P             | <i>De Novo</i> |
| 240            | <i>ITPR1</i>    | NM_002222         | c.C805T                  | p.R269W               | Het           | AD          | P             | <i>De Novo</i> |
| 242            | <i>ADCY5</i>    | NM_183357         | c.C1252T                 | p.R418W               | Het           | AD          | P             |                |
| 243            | <i>ADCY5</i>    | NM_183357         | c.C1252T                 | p.R418W               | Het           | AD          | P             | <i>De Novo</i> |
| 244            | <i>ADCY5</i>    | NM_183357         | c.C1252T                 | p.R418W               | Het           | AD          | P             | <i>De Novo</i> |
| 245            | <i>ADCY5</i>    | NM_183357         | c.C1252T                 | p.R418W               | Het           | AD          | P             | <i>De Novo</i> |
| 246            | <i>TUBB2B</i>   | NM_178012         | c.T350C                  | p.L117P               | Het           | AD          | LP            | <i>De Novo</i> |
| 247            | <i>TUBB2B</i>   | NM_178012         | c.C533T                  | p.T178M               | Het           | AD          | P             | <i>De Novo</i> |
| 248            | <i>DNMT3A</i>   | NM_175629         | c.G1628A                 | p.G543D               | Het           | AD          | LP            | <i>De Novo</i> |
| 249            | <i>KCNQ2</i>    | NM_172107         | c.G1742A                 | p.R581Q               | Het           | AD          | P             | <i>De Novo</i> |
| 250            | <i>KCNQ2</i>    | NM_172107         | c.A712C                  | p.I238L               | Het           | AD          | LP            |                |
| 251            | <i>KCNQ2</i>    | NM_172107         | c.G691C                  | p.E231Q               | Het           | AD          | P             | <i>De Novo</i> |
| 252            | <i>KCNQ2</i>    | NM_172107         | c.C1678T                 | p.R560W               | Het           | AD          | P             | <i>De Novo</i> |
| 253            | <i>KCNQ2</i>    | NM_172107         | c.C740T                  | p.S247L               | Het           | AD          | P             | <i>De Novo</i> |
| 254            | <i>ARID2</i>    | NM_152641         | c.C2872T                 | p.Q958X               | Het           | AD          | P             | <i>De Novo</i> |
| 255            | <i>ARID2</i>    | NM_152641         | c.C4732T                 | p.Q1578X              | Het           | AD          | P             | <i>De Novo</i> |
| 256            | <i>ATP1A3</i>   | NM_152296         | c.G2191A                 | p.V731I               | Het           | AD          | LP            | <i>De Novo</i> |
| 257            | <i>ATP1A3</i>   | NM_152296         | c.G2267A                 | p.R756H               | Het           | AD          | P             | <i>De Novo</i> |
| 258            | <i>NIPBL</i>    | NM_133433         | c.A1521C                 | p.Q507H               | Het           | AD          | LP            | <i>De Novo</i> |
| 259            | <i>NACC1</i>    | NM_052876         | c.C892T                  | p.R298W               | Het           | AD          | P             | <i>De Novo</i> |
| 260            | <i>NALCN</i>    | NM_052867         | c.A1733G                 | p.Y578C               | Het           | AD          | P             |                |
| 261            | <i>SHANK3</i>   | NM_033517         | c.3637_3638insG          | p.A1213fs             | Het           | AD          | P             | <i>De Novo</i> |
| 262            | <i>SON</i>      | NM_032195         | c.58_59insGC             | p.I20fs               | Het           | AD          | P             | <i>De Novo</i> |
| 263            | <i>ASXL3</i>    | NM_030632         | c.3325_3326del           | p.1109_1109del        | Het           | AD          | P             | <i>De Novo</i> |
| 264            | <i>IFIH1</i>    | NM_022168         | c.G2927A                 | p.G976D               | Het           | AD          | LP            | <i>De Novo</i> |
| 265            | <i>GABRB2</i>   | NM_021911         | c.T863G                  | p.I288S               | Het           | AD          | LP            | <i>De Novo</i> |
| 266            | <i>FGF12</i>    | NM_021032         | c.G341A                  | p.R114H               | Het           | AD          | P             | <i>De Novo</i> |
| 267            | <i>SCN2A</i>    | NM_021007         | c.T4832C                 | p.L1611P              | Het           | AD          | LP            | <i>De Novo</i> |
| 268            | <i>GNAO1</i>    | NM_020988         | c.724-8G>A               |                       | Het           | AD          | P             | <i>De Novo</i> |
| 269            | <i>GNAO1</i>    | NM_020988         | c.T470C                  | p.L157P               | Het           | AD          | LP            | <i>De Novo</i> |
| 270            | <i>GNAO1</i>    | NM_020988         | c.G626A                  | p.R209H               | Het           | AD          | P             | <i>De Novo</i> |

| SNVs ID | Gene   | Ref Seq ID | Coding DNA change           | Protein change | Zygoty | Inh. | Class. | Origin         |
|---------|--------|------------|-----------------------------|----------------|--------|------|--------|----------------|
| 271     | GNAO1  | NM_020988  | c.724-8G>A                  |                | Het    | AD   | P      | De Novo        |
| 272     | GNAO1  | NM_020988  | c.G736A                     | p.E246K        | Het    | AD   | P      | De Novo        |
| 273     | GNAO1  | NM_020988  | c.G736A                     | p.E246K        | Het    | AD   | LP     | De Novo        |
| 274     | KCNT1  | NM_020822  | c.C1309T                    | p.L437F        | Het    | AD   | LP     | De Novo        |
| 275     | PHIP   | NM_017934  | c.3782+2AAGT>-              |                | Het    | AD   | LP     |                |
| 276     | PHIP   | NM_017934  | c.600+1G>-                  |                | Het    | AD   | P      | De Novo        |
| 277     | ATL1   | NM_015915  | c.G1221C                    | p.K407N        | Het    | AD   | LP     | Pat,<br>mosaic |
| 278     | ATL1   | NM_015915  | c.C756A                     | p.N252K        | Het    | AD   | LP     |                |
| 279     | AUTS2  | NM_015570  | c.C946T                     | p.R316X        | Het    | AD   | P      | De Novo        |
| 280     | SETBP1 | NM_015559  | c.C1876T                    | p.R626X        | Het    | AD   | P      | De Novo        |
| 281     | ADNP   | NM_015339  | c.C2157G                    | p.Y719X        | Het    | AD   | P      |                |
| 282     | ADNP   | NM_015339  | c.190_191insA               | p.T64fs        | Het    | AD   | P      | De Novo        |
| 283     | ASXL1  | NM_015338  | c.C1210T                    | p.R404X        | Het    | AD   | P      | De Novo        |
| 284     | ASXL1  | NM_015338  | c.C2922A                    | p.Y974X        | Het    | AD   | P      | De Novo        |
| 285     | MED13L | NM_015335  | c.C1336T                    | p.Q446X        | Het    | AD   | P      |                |
| 286     | SATB2  | NM_015265  | c.G1286A                    | p.R429Q        | Het    | AD   | P      | De Novo        |
| 287     | SATB2  | NM_015265  | c.C997T                     | p.Q333X        | Het    | AD   | P      | De Novo        |
| 288     | CAMTA1 | NM_015215  | c.627delG                   | p.W209X        | Het    | AD   | P      | De Novo        |
| 289     | CAMTA1 | NM_015215  | c.C4231T                    | p.R1411X       | Het    | AD   | P      |                |
| 290     | ZNF423 | NM_015069  | c.3161_3162insC             | p.S1054fs      | Het    | AD   | P      | De Novo        |
| 291     | SPAST  | NM_014946  | c.G1258C                    | p.E420Q        | Het    | AD   | P      | De Novo        |
| 292     | SPAST  | NM_014946  | c.1729-1G>A                 |                | Het    | AD   | P      | Mat            |
| 293     | SPAST  | NM_014946  | c.G1334C                    | p.S445T        | Het    | AD   | LP     | De Novo        |
| 294     | ZEB2   | NM_014795  | c.1816_1819del              | p.606_607del   | Het    | AD   | P      | De Novo        |
| 295     | ZEB2   | NM_014795  | c.537_538insACCATTAT<br>TTA | p.A179fs       | Het    | AD   | P      | De Novo        |
| 296     | SCN8A  | NM_014191  | c.T2642C                    | p.V881A        | Het    | AD   | LP     | De Novo        |
| 297     | SCN8A  | NM_014191  | c.C5614T                    | p.R1872W       | Het    | AD   | P      | De Novo        |
| 298     | SETD2  | NM_014159  | c.C4774T                    | p.R1592X       | Het    | AD   | P      | Mat            |
| 299     | DNM1L  | NM_012062  | c.G436A                     | p.D146N        | Het    | AD   | LP     | De Novo        |
| 300     | GRIN1  | NM_007327  | c.C2441A                    | p.A814D        | Het    | AD   | LP     | De Novo        |
| 301     | GRIN1  | NM_007327  | c.G1858C                    | p.G620R        | Het    | AD   | LP     |                |

| SNVs ID | Gene    | Ref Seq ID | Coding DNA change         | Protein change | Zygoty | Inh. | Class. | Origin         |
|---------|---------|------------|---------------------------|----------------|--------|------|--------|----------------|
| 302     | GRIN1   | NM_007327  | c.G2479A                  | p.G827R        | Het    | AD   | P      | De Novo        |
| 303     | AFG3L2  | NM_006796  | c.G1994T                  | p.G665V        | Het    | AD   | P      | De Novo        |
| 304     | SYNGAP1 | NM_006772  | c.C739T                   | p.Q247X        | Het    | AD   | P      | De Novo        |
| 305     | KAT6A   | NM_006766  | c.3412delC                | p.L1138fs      | Het    | AD   | P      | De Novo        |
| 306     | KAT6A   | NM_006766  | c.G4645A                  | p.G1549S       | Het    | AD   | P      | De Novo        |
| 307     | KAT6A   | NM_006766  | c.G3661T                  | p.E1221X       | Het    | AD   | P      | De Novo        |
| 308     | KAT6A   | NM_006766  | c.C3070T                  | p.R1024X       | Het    | AD   | P      | De Novo        |
| 309     | KAT6A   | NM_006766  | c.A3212C                  | p.E1071A       | Het    | AD   | LP     | De Novo        |
| 310     | SLC2A1  | NM_006516  | c.C844T                   | p.Q282X        | Het    | AD   | P      |                |
| 311     | SLC2A1  | NM_006516  | c.512_513insC             | p.A171fs       | Het    | AD   | P      |                |
| 312     | SLC2A1  | NM_006516  | c.1083_1084insA           | p.L361fs       | Het    | AD   | P      | De Novo        |
| 313     | TUBB4A  | NM_006087  | c.G745A                   | p.D249N        | Het    | AD   | P      | De Novo        |
| 314     | TUBB4A  | NM_006087  | c.G745A                   | p.D249N        | Het    | AD   | P      | De Novo        |
| 315     | TUBB4A  | NM_006087  | c.G535T                   | p.V179L        | Het    | AD   | P      | De Novo        |
| 316     | TUBB3   | NM_006086  | c.G862A                   | p.E288K        | Het    | AD   | P      | De Novo        |
| 317     | TUBB3   | NM_006086  | c.G292A                   | p.G98S         | Het    | AD   | P      | De Novo        |
| 318     | TUBB3   | NM_006086  | c.C1138T                  | p.R380C        | Het    | AD   | P      | De Novo        |
| 319     | TUBB3   | NM_006086  | c.G763A                   | p.V255I        | Het    | AD   | P      | De Novo        |
| 320     | TUBA1A  | NM_006009  | c.C521T                   | p.A174V        | Het    | AD   | LP     | Pat,<br>mosaic |
| 321     | TUBA1A  | NM_006009  | c.C919T                   | p.P307S        | Het    | AD   | LP     | De Novo        |
| 322     | TUBA1A  | NM_006009  | c.G379A                   | p.D127N        | Het    | AD   | LP     | De Novo        |
| 323     | TUBA1A  | NM_006009  | c.C1076T                  | p.P359L        | Het    | AD   | LP     | De Novo        |
| 324     | PURA    | NM_005859  | c.T305G                   | p.L102R        | Het    | AD   | P      | De Novo        |
| 325     | PURA    | NM_005859  | c.G325T                   | p.E109X        | Het    | AD   | P      | De Novo        |
| 326     | PURA    | NM_005859  | c.T263C                   | p.I88T         | Het    | AD   | LP     | De Novo        |
| 327     | FOXP1   | NM_005249  | c.186_187insGCCGCC<br>GCC | p.A62fs        | Het    | AD   | P      | De Novo        |
| 328     | FOXP1   | NM_005249  | c.855delC                 | p.A285fs       | Het    | AD   | P      | De Novo        |
| 329     | FOXP1   | NM_005249  | c.G675A                   | p.W225X        | Het    | AD   | P      | De Novo        |
| 330     | KCNC3   | NM_004977  | c.G1609C                  | p.V537L        | Het    | AD   | P      | De Novo        |
| 331     | KCNB1   | NM_004975  | c.C916T                   | p.R306C        | Het    | AD   | P      |                |
| 332     | KIF11   | NM_004523  | c.1040_1041insT           | p.L347fs       | Het    | AD   | P      | De Novo        |

| <b>SNVs ID</b> | <b>Gene</b>    | <b>Ref Seq ID</b> | <b>Coding DNA change</b> | <b>Protein change</b> | <b>Zygoty</b> | <b>Inh.</b> | <b>Class.</b> | <b>Origin</b>  |
|----------------|----------------|-------------------|--------------------------|-----------------------|---------------|-------------|---------------|----------------|
| 333            | <i>EZH2</i>    | NM_004456         | c.C2007G                 | p.S669R               | Het           | AD          | LP            | <i>De Novo</i> |
| 334            | <i>DNM1</i>    | NM_004408         | c.A1169C                 | p.Y390S               | Het           | AD          | LP            | <i>De Novo</i> |
| 335            | <i>CREBBP</i>  | NM_004380         | c.G4393A                 | p.G1465R              | Het           | AD          | LP            | <i>De Novo</i> |
| 336            | <i>KIF1A</i>   | NM_004321         | c.G920A                  | p.R307Q               | Het           | AD          | P             | <i>De Novo</i> |
| 337            | <i>KIF1A</i>   | NM_004321         | c.C650G                  | p.S217C               | Het           | AD          | P             | <i>De Novo</i> |
| 338            | <i>KIF1A</i>   | NM_004321         | c.C254A                  | p.A85D                | Het           | AD          | LP            | <i>De Novo</i> |
| 339            | <i>KIF1A</i>   | NM_004321         | c.G595A                  | p.G199R               | Het           | AD          | LP            | <i>De Novo</i> |
| 340            | <i>KIF1A</i>   | NM_004321         | c.C760T                  | p.R254W               | Het           | AD          | P             |                |
| 341            | <i>TRIP12</i>  | NM_004238         | c.1007+1G>A              |                       | Het           | AD          | P             | Mat,<br>mosaic |
| 342            | <i>SLC1A2</i>  | NM_004171         | c.G244A                  | p.G82R                | Het           | AD          | P             | <i>De Novo</i> |
| 343            | <i>YY1</i>     | NM_003403         | c.860_864del             | p.287_288del          | Het           | AD          | P             | <i>De Novo</i> |
| 344            | <i>STXBP1</i>  | NM_003165         | c.T1060C                 | p.C354R               | Het           | AD          | P             | <i>De Novo</i> |
| 345            | <i>STXBP1</i>  | NM_003165         | c.C1075T                 | p.Q359X               | Het           | AD          | P             | <i>De Novo</i> |
| 346            | <i>STXBP1</i>  | NM_003165         | c.T872C                  | p.L291P               | Het           | AD          | LP            |                |
| 347            | <i>STXBP1</i>  | NM_003165         | c.C1012T                 | p.Q338X               | Het           | AD          | P             | <i>De Novo</i> |
| 348            | <i>STXBP1</i>  | NM_003165         | c.G875A                  | p.R292H               | Het           | AD          | P             | <i>De Novo</i> |
| 349            | <i>SOX2</i>    | NM_003106         | c.70_89del               | p.24_30del            | Het           | AD          | P             | <i>De Novo</i> |
| 350            | <i>SMARCA2</i> | NM_003070         | c.T1553C                 | p.I518T               | Het           | AD          | LP            | <i>De Novo</i> |
| 351            | <i>PTPN11</i>  | NM_002834         | c.G417C                  | p.E139D               | Het           | AD          | P             |                |
| 352            | <i>PTPN11</i>  | NM_002834         | c.A1387G                 | p.I463V               | Het           | AD          | LP            |                |
| 353            | <i>MAP2K1</i>  | NM_002755         | c.A389G                  | p.Y130C               | Het           | AD          | P             | <i>De Novo</i> |
| 354            | <i>MAP2K1</i>  | NM_002755         | c.C355T                  | p.H119Y               | Het           | AD          | P             | <i>De Novo</i> |
| 355            | <i>MAP2K1</i>  | NM_002755         | c.A389G                  | p.Y130C               | Het           | AD          | P             | <i>De Novo</i> |
| 356            | <i>MAP2K1</i>  | NM_002755         | c.A389G                  | p.Y130C               | Het           | AD          | P             | <i>De Novo</i> |
| 357            | <i>MEF2C</i>   | NM_002397         | c.C565T                  | p.R189X               | Het           | AD          | P             | <i>De Novo</i> |
| 358            | <i>ITPR1</i>   | NM_002222         | c.C1768T                 | p.L590F               | Het           | AD          | LP            | <i>De Novo</i> |
| 359            | <i>GNB1</i>    | NM_002074         | c.T239C                  | p.I80T                | Het           | AD          | P             | <i>De Novo</i> |
| 360            | <i>GFAP</i>    | NM_002055         | c.C252G                  | p.I84M                | Het           | AD          | LP            | Pat,<br>mosaic |
| 361            | <i>EEF1A2</i>  | NM_001958         | c.G208A                  | p.G70S                | Het           | AD          | P             |                |
| 362            | <i>CTNNB1</i>  | NM_001904         | c.760delT                | p.Y254fs              | Het           | AD          | P             |                |
| 363            | <i>CTNNB1</i>  | NM_001904         | c.2138-1G>C              |                       | Het           | AD          | LP            |                |



| SNVs ID | Gene    | Ref Seq ID   | Coding DNA change   | Protein change     | Zygoty | Inh. | Class. | Origin  |
|---------|---------|--------------|---------------------|--------------------|--------|------|--------|---------|
| 364     | CTNNB1  | NM_001904    | c.2116_2117insAGAAC | p.P706fs           | Het    | AD   | P      |         |
| 365     | CTNNB1  | NM_001904    | c.C796T             | p.Q266X            | Het    | AD   | P      | De Novo |
| 366     | CTNNB1  | NM_001904    | c.2076+2T>C         |                    | Het    | AD   | P      | De Novo |
| 367     | CTNNB1  | NM_001904    | c.C1981T            | p.R661X            | Het    | AD   | P      |         |
| 368     | CTNNB1  | NM_001904    | c.C1603T            | p.R535X            | Het    | AD   | P      | De Novo |
| 369     | CTNNB1  | NM_001904    | c.1690_1691insGG    | p.V564fs           | Het    | AD   | P      | De Novo |
| 370     | CTNNB1  | NM_001904    | c.C1420T            | p.R474X            | Het    | AD   | P      |         |
| 371     | CTNNB1  | NM_001904    | c.1683+5G>C         |                    | Het    | AD   | P      | De Novo |
| 372     | CTNNB1  | NM_001904    | c.C337T             | p.Q113X            | Het    | AD   | P      | De Novo |
| 373     | CTNNB1  | NM_001904    | c.998_999insA       | p.Y333_E334delinsX | Het    | AD   | P      | De Novo |
| 374     | COL4A2  | NM_001846    | c.G1898A            | p.G633D            | Het    | AD   | LP     |         |
| 375     | COL4A2  | NM_001846    | c.G2894A            | p.G965D            | Het    | AD   | LP     | Pat     |
| 376     | COL4A1  | NM_001845    | c.G2086A            | p.G696S            | Het    | AD   | P      | De Novo |
| 377     | COL4A1  | NM_001845    | c.G3977T            | p.G1326V           | Het    | AD   | P      | De Novo |
| 378     | COL4A1  | NM_001845    | c.G3611A            | p.G1204E           | Het    | AD   | LP     |         |
| 379     | COL4A1  | NM_001845    | c.G3497A            | p.G1166D           | Het    | AD   | P      |         |
| 380     | COL4A1  | NM_001845    | c.G3715A            | p.G1239R           | Het    | AD   | P      | De Novo |
| 381     | DYRK1A  | NM_001396    | c.290_291del        | p.97_97del         | Het    | AD   | P      | De Novo |
| 382     | DYRK1A  | NM_001396    | c.G829C             | p.A277P            | Het    | AD   | LP     | De Novo |
| 383     | DYRK1A  | NM_001396    | c.C613T             | p.R205X            | Het    | AD   | P      | De Novo |
| 384     | DYRK1A  | NM_001396    | c.C349T             | p.R117X            | Het    | AD   | P      | De Novo |
| 385     | DYRK1A  | NM_001396    | c.784_785insA       | p.T262fs           | Het    | AD   | P      | De Novo |
| 386     | DYNC1H1 | NM_001376    | c.C5884T            | p.R1962C           | Het    | AD   | P      | De Novo |
| 387     | CTBP1   | NM_001328    | c.C1024T            | p.R342W            | Het    | AD   | P      |         |
| 388     | CLTC    | NM_001288653 | c.A2414T            | p.E805V            | Het    | AD   | LP     | De Novo |
| 389     | CHD2    | NM_001271    | c.C2702A            | p.A901E            | Het    | AD   | LP     | De Novo |
| 390     | KMT2A   | NM_001197104 | c.G3473C            | p.C1158S           | Het    | AD   | P      | De Novo |
| 391     | KMT2A   | NM_001197104 | c.G3482C            | p.C1161S           | Het    | AD   | LP     | De Novo |
| 392     | KMT2A   | NM_001197104 | c.7726_7729del      | p.2576_2577del     | Het    | AD   | P      | De Novo |
| 393     | CHD8    | NM_001170629 | c.C3291A            | p.H1097Q           | Het    | AD   | LP     | De Novo |
| 394     | CHD8    | NM_001170629 | c.C4895T            | p.S1632L           | Het    | AD   | LP     | De Novo |
| 395     | SCN1A   | NM_001165963 | c.A2628T            | p.L876F            | Het    | AD   | LP     | De Novo |

| SNVs ID | Gene    | Ref Seq ID   | Coding DNA change           | Protein change    | Zygoty | Inh. | Class. | Origin  |
|---------|---------|--------------|-----------------------------|-------------------|--------|------|--------|---------|
| 396     | SCN1A   | NM_001165963 | c.A4172G                    | p.N1391S          | Mosaic | AD   | LP     |         |
| 397     | SCN1A   | NM_001165963 | c.G4441A                    | p.V1481I          | Het    | AD   | LP     | De Novo |
| 398     | SIN3A   | NM_001145358 | c.2277+4A>G                 |                   | Het    | AD   | LP     | De Novo |
| 399     | SPTAN1  | NM_001130438 | c.6619_6621del              | p.2207_2207del    | Het    | AD   | P      | De Novo |
| 400     | SPTAN1  | NM_001130438 | c.6916_6917insACCAGC<br>TGG | p.G2306delinsDQLG | Het    | AD   | P      | De Novo |
| 401     | SPTAN1  | NM_001130438 | c.T6938C                    | p.L2313P          | Het    | AD   | LP     | De Novo |
| 402     | CACNA1A | NM_001127221 | c.6492_6493insT             | p.S2164fs         | Het    | AD   | P      | De Novo |
| 403     | CACNA1A | NM_001127221 | c.T4070G                    | p.I1357S          | Het    | AD   | P      | De Novo |
| 404     | CACNA1A | NM_001127221 | c.G4046A                    | p.R1349Q          | Het    | AD   | P      | De Novo |
| 405     | CACNA1A | NM_001127221 | c.C5396T                    | p.S1799L          | Het    | AD   | P      | De Novo |
| 406     | CACNA1A | NM_001127221 | c.4497_4499del              | p.1499_1500del    | Het    | AD   | P      |         |
| 407     | ADAR    | NM_001111    | c.G3019A                    | p.G1007R          | Het    | AD   | P      |         |
| 408     | ACTB    | NM_001101    | c.A215G                     | p.E72G            | Het    | AD   | LP     | De Novo |
| 409     | ACTB    | NM_001101    | c.C479T                     | p.T160I           | Het    | AD   | LP     | De Novo |
| 410     | ACTB    | NM_001101    | c.G826A                     | p.E276K           | Het    | AD   | LP     | De Novo |
| 411     | TCF4    | NM_001083962 | c.C652T                     | p.Q218X           | Het    | AD   | P      | De Novo |
| 412     | TCF4    | NM_001083962 | c.C873G                     | p.Y291X           | Het    | AD   | P      | De Novo |
| 413     | TCF4    | NM_001083962 | c.G655A                     | p.D219N           | Het    | AD   | P      | De Novo |
| 414     | TCF4    | NM_001083962 | c.1029delA                  | p.S343fs          | Het    | AD   | P      | De Novo |
| 415     | TCF4    | NM_001083962 | c.1146+5G>T                 |                   | Het    | AD   | P      | De Novo |
| 416     | SETD5   | NM_001080517 | c.1741_1742del              | p.581_581del      | Het    | AD   | P      | De Novo |
| 417     | NKX2-1  | NM_001079668 | c.C390G                     | p.Y130X           | Het    | AD   | P      | Mat     |
| 418     | NKX2-1  | NM_001079668 | c.C637T                     | p.Q213X           | Het    | AD   | P      | De Novo |
| 419     | TUBB2A  | NM_001069    | c.C743T                     | p.A248V           | Het    | AD   | P      | De Novo |
| 420     | TUBB2A  | NM_001069    | c.G580A                     | p.E194K           | Het    | AD   | P      | De Novo |
| 421     | TUBB2A  | NM_001069    | c.C743T                     | p.A248V           | Het    | AD   | P      | De Novo |
| 422     | TUBB2A  | NM_001069    | c.G394A                     | p.G132S           | Het    | AD   | LP     | De Novo |
| 423     | RYR2    | NM_001035    | c.T14341C                   | p.Y4781H          | Het    | AD   | LP     | De Novo |
| 424     | AHDC1   | NM_001029882 | c.4428delC                  | p.S1476fs         | Het    | AD   | P      | De Novo |
| 425     | AHDC1   | NM_001029882 | c.1116_1117insC             | p.G372fs          | Het    | AD   | P      | De Novo |
| 426     | EBF3    | NM_001005463 | c.556_559del                | p.186_187del      | Het    | AD   | P      | Mat     |

| SNVs ID | Gene          | Ref Seq ID | Coding DNA change | Protein change | Zygoty | Inh. | Class. | Origin         |
|---------|---------------|------------|-------------------|----------------|--------|------|--------|----------------|
| 427     | <i>GRIN2B</i> | NM_000834  | c.C2201T          | p.A734V        | Het    | AD   | LP     | <i>De Novo</i> |
| 428     | <i>GABRA1</i> | NM_000806  | c.T788C           | p.M263T        | Mosaic | AD   | P      | <i>De Novo</i> |
| 429     | <i>ATP1A2</i> | NM_000702  | c.C2500T          | p.R834X        | Het    | AD   | P      | Mat            |
| 430     | <i>RYR1</i>   | NM_000540  | c.A13909G         | p.T4637A       | Het    | AD   | LP     | Mat            |
| 431     | <i>GNAS</i>   | NM_000516  | c.A898T           | p.K300X        | Het    | AD   | P      | <i>De Novo</i> |
| 432     | <i>GLRA1</i>  | NM_000171  | c.G896A           | p.R299Q        | Het    | AD   | LP     | <i>De Novo</i> |

| CNVs ID | Chr | Start     | End       | Size (bp) | CNV | Zygoty | Gene(s)       | Class. | Origin         |
|---------|-----|-----------|-----------|-----------|-----|--------|---------------|--------|----------------|
| 438     | 11  | 118339489 | 118355690 | 16201     | Del | Het    | <i>KMT2A</i>  | P      | <i>De Novo</i> |
| 215     | 13  | 108127905 | 115103529 | 6975624   | Del | Het    | Multi-gene    | P      | <i>De Novo</i> |
| 214     | 3   | 195778812 | 197259394 | 1480582   | Del | Het    | Multi-gene    | P      |                |
| 241     | 17  | 14100118  | 15458708  | 1358590   | Del | Het    | Multi-gene    | P      |                |
| 436     | 17  | 7119830   | 7394448   | 274618    | Del | Het    | Multi-gene    | LP     | <i>De Novo</i> |
| 433     | 17  | 25300199  | 34318288  | 9018089   | Dup |        | Multi-gene    | P      | <i>De Novo</i> |
| 434     | 18  | 60841655  | 78012829  | 17171174  | Del | Het    | Multi-gene    | P      |                |
| 216     | 1   | 224577268 | 224599018 | 21750     | Del | Het    | <i>WDR26</i>  | LP     | <i>De Novo</i> |
| 437     | 3   | 41265383  | 41288555  | 23172     | Del | Het    | <i>CTNNA1</i> | P      | <i>De Novo</i> |
| 439     | 8   | 8145191   | 11230648  | 3085457   | Del | Het    | Multi-gene    | P      | <i>De Novo</i> |
| 440     | 11  | 44934901  | 47383351  | 2448450   | Del | Het    | Multi-gene    | LP     | <i>De Novo</i> |
| 217     | 22  | 18894339  | 21440514  | 2546175   | Del | Het    | <i>CLTCL1</i> | P      | <i>De Novo</i> |
| 435     | 7   | 70238862  | 70252418  | 13556     | Del | Het    | <i>AUTS2</i>  | P      | <i>De Novo</i> |
| 93      | X   | 133623701 | 133627872 | 4171      | Del | Hemi   | <i>HPRT1</i>  | P      | Mat            |
| 94      | X   | 60701     | 57926564  | 57865863  | Del | Het    | Multi-gene    | P      | <i>De Novo</i> |
| 94      | X   | 61931689  | 155246271 | 93314582  | Del | Mosaic | Multi-gene    | P      | <i>De Novo</i> |
| 92      | 22  | 2030782   | 2052415   | 21633     | Del | Hom    | <i>TANGO2</i> | P      |                |
| 88      | 13  | 23566962  | 24827740  | 1260778   | Del | Het    | <i>SACS</i>   | P      | Pat            |
| 83      | 14  | 31535184  | 31535821  | 637       | Del | Het    | <i>AP4S1</i>  | P      | Mat            |
| 84      | 16  | 1559746   | 1561322   | 1576      | Del | Het    | <i>TELO2</i>  | LP     | Mat            |
| 85      | 1   | 150978754 | 151006711 | 27957     | Del | Het    | <i>PRUNE</i>  | P      | Pat            |
| 91      | 22  | 20030782  | 20052415  | 21633     | Del | Hom    | <i>TANGO2</i> | P      | Mat+Pat        |

| <b>CNVs ID</b> | <b>Chr</b> | <b>Start</b> | <b>End</b> | <b>Size (bp)</b> | <b>CNV</b> | <b>Zygoty</b> | <b>Gene(s)</b>       | <b>Class.</b> | <b>Origin</b> |
|----------------|------------|--------------|------------|------------------|------------|---------------|----------------------|---------------|---------------|
| 90             | 5          | 60239901     | 60242406   | 2505             | Del        | Hom           | <i>ERCC8,NDUFAF2</i> | P             |               |
| 87             | 6          | 5368490      | 5369668    | 1178             | Del        | Het           | <i>FARS2</i>         | P             | Mat           |
| 89             | 17         | 6609864      | 6617121    | 7257             | Del        | Hom           | <i>SLC13A5</i>       | P             | Mat+Pat       |
| 86             | 8          | 141285515    | 141321708  | 36193            | Del        | Het           | <i>TRAPPC9</i>       | P             | Mat           |

Abbreviations: SNVs, single nucleotide variants; Inh, inheritance; Class, classification; Hom, homozygous; Het, heterozygous; Hemi, hemizygous; AR, autosomal recessive; AD, autosomal dominant; XL, X-linked; P, pathogenic; LP, likely pathogenic; Mat, maternal; Pat, paternal; GM, germline mosaicism; CNVs, copy number variants; Chr, chromosome; Bp, base pairs.

**eTable 2.** Healthcare-based cohort pathogenic/likely pathogenic variants

| SNVs ID | Gene   | RefSeq ID      | Chr. | Position  | Ref. | Alt.   | Coding DNA change | Protein change     | Zygoty | Class. |
|---------|--------|----------------|------|-----------|------|--------|-------------------|--------------------|--------|--------|
| 1       | ASXL3  | NM_030632.3    | 18   | 33739907  | C    | T      | c.2503C>T         | p.Gln835Ter        | Het    | LP     |
| 2       | ATL1   | NM_015915.4    | 14   | 50614425  | C    | A      | c.776C>A          | p.Ser259Tyr        | Het    | LP     |
| 3       | ATL1   | NM_015915.4    | 14   | 50614425  | C    | A      | c.776C>A          | p.Ser259Tyr        | Het    | LP     |
| 4       | CAMTA1 | NM_015215.4    | 1    | 7664147   | AC   | A      | c.1602del         | p.Glu535ArgfsTer28 | Het    | LP     |
| 5       | KANSL1 | NM_015443.3    | 17   | 46171228  | G    | A      | c.916C>T          | p.Gln306Ter        | Het    | P      |
| 6       | MECP2  | NM_004992.3    | X    | 154032337 | G    | A      | c.247C>T          | p.Gln83Ter         | Hemi   | LP     |
| 7       | MECP2  | NM_004992.3    | X    | 154030912 | G    | A      | c.916C>T          | p.Arg306Cys        | Het    | P      |
| 8       | SLC2A1 | NM_006516.3    | 1    | 42927684  | C    | T      | c.1199G>A         | p.Arg400His        | Het    | P      |
| 9       | TSC1   | NM_000368.4    | 9    | 132904410 | C    | G      | c.2041+1G>C       | NA                 | Het    | LP     |
| 10      | TUBA1A | NM_006009.4    | 12   | 49185380  | T    | C      | c.986A>G          | p.Asn329Ser        | Het    | LP     |
| 11      | GCDH   | NM_000159.4    | 19   | 12897824  | C    | T      | c.1204C>T         | p.Arg402Trp        | Het    | P      |
| 11      | GCDH   | NM_000159.4    | 19   | 12897713  | G    | A      | c.1093G>A         | p.Glu365Lys        | Het    | LP     |
| 12      | IQSEC2 | NM_001111125.3 | X    | 53255944  | AG   | A      | c.854del          | p.Pro285LeufsTer21 | Hemi   | P      |
| 13      | L1CAM  | NM_001278116.1 | X    | 153870841 | C    | CATCAT | c.642_643insATGAT | p.Gly215MetfsTer23 | Hemi   | P      |
| 13      | L1CAM  | NM_001278116.1 | X    | 153870842 | TGG  | T      | c.640_641del      | p.Pro214ArgfsTer12 | Hemi   | P      |
| 14      | KMT2A  | NM_001197104.1 | 11   | 118436659 | CG   | C      | c.149del          | p.Gly50AlafsTer100 | Het    | LP     |

| CNVs ID | Chr | Start     | End       | Size (bp) | CNV | Zygoty | Gene(s)    | Class. |
|---------|-----|-----------|-----------|-----------|-----|--------|------------|--------|
| 15      | 4   | 125614348 | 140412996 | 14798648  | Del | Het    | Multi-gene | P      |
| 16      | 16  | 15031734  | 16198182  | 1166448   | Del | Het    | Multi-gene | P      |
| 17      | 8   | 15623079  | 15673836  | 50757     | Del | Hom    | TUSC3      | LP     |
| 18      | 18  | 55228224  | 55234684  | 6460      | Del | Het    | TCF4       | P      |
| 19      | 17  | 16923995  | 20314065  | 3390070   | Del | Het    | Multi-gene | P      |

Abbreviations: SNVs, single nucleotide variants; Chr, chromosome; Ref, reference allele; Alt, alternative allele; Het, heterozygous; Hemi, hemizygous; Hom, homozygous; Class, classification; P, pathogenic; LP, likely pathogenic; CNVs, copy number variants; Bp, base pairs.

**eTable 3.** Cross-cohort spectrum of genomic variation**A. All genes identified across cohorts (n=229)**

|                 |                |                 |                 |                 |                |                |               |
|-----------------|----------------|-----------------|-----------------|-----------------|----------------|----------------|---------------|
| <i>ACTB</i>     | <i>CASK</i>    | <i>EPG5</i>     | <i>IDS</i>      | <i>NALCN</i>    | <i>RPE65</i>   | <i>STAMBP</i>  | <i>YY1</i>    |
| <i>ACTG1</i>    | <i>CDC42</i>   | <i>ERCC6</i>    | <i>IFIH1</i>    | <i>NGLY1</i>    | <i>RYR1</i>    | <i>STAT3</i>   | <i>ZC4H2</i>  |
| <i>ADAR</i>     | <i>CDKL5</i>   | <i>ERCC8</i>    | <i>IQSEC2</i>   | <i>NIPBL</i>    | <i>RYR2</i>    | <i>STXBP1</i>  | <i>ZDHHC9</i> |
| <i>ADCY5</i>    | <i>CHD2</i>    | <i>EXOSC3</i>   | <i>ITPR1</i>    | <i>NKX2-1</i>   | <i>SACS</i>    | <i>SUMF1</i>   | <i>ZEB2</i>   |
| <i>ADNP</i>     | <i>CHD8</i>    | <i>EZH2</i>     | <i>KANSL1</i>   | <i>NKX6-2</i>   | <i>SATB2</i>   | <i>SYNGAP1</i> | <i>ZNF423</i> |
| <i>AFG3L2</i>   | <i>CHMP1A</i>  | <i>FA2H</i>     | <i>KAT6A</i>    | <i>OPA1</i>     | <i>SCN1A</i>   | <i>TAF1</i>    |               |
| <i>AHDC1</i>    | <i>CHRNE</i>   | <i>FARS2</i>    | <i>KCNB1</i>    | <i>OPHN1</i>    | <i>SCN2A</i>   | <i>TANGO2</i>  |               |
| <i>ALDH3A2</i>  | <i>CLTC</i>    | <i>FBN2</i>     | <i>KCNC3</i>    | <i>OTUD6B</i>   | <i>SCN8A</i>   | <i>TBCK</i>    |               |
| <i>AP1S2</i>    | <i>CLTCL1</i>  | <i>FGD1</i>     | <i>KCNQ2</i>    | <i>PDHA1</i>    | <i>SEPSECS</i> | <i>TBL1XR1</i> |               |
| <i>AP4E1</i>    | <i>COL4A1</i>  | <i>FGF12</i>    | <i>KCNT1</i>    | <i>PDHX</i>     | <i>SETBP1</i>  | <i>TCF4</i>    |               |
| <i>AP4M1</i>    | <i>COL4A2</i>  | <i>FGFR1</i>    | <i>KCTD7</i>    | <i>PEX16</i>    | <i>SETD2</i>   | <i>TELO2</i>   |               |
| <i>AP4S1</i>    | <i>CREBBP</i>  | <i>FH</i>       | <i>KDM5C</i>    | <i>PGAP1</i>    | <i>SETD5</i>   | <i>TOE1</i>    |               |
| <i>ARID1B</i>   | <i>CTBP1</i>   | <i>FOXG1</i>    | <i>KIAA2022</i> | <i>PHIP</i>     | <i>SHANK3</i>  | <i>TPP1</i>    |               |
| <i>ARID2</i>    | <i>CTC1</i>    | <i>FRRS1L</i>   | <i>KIF11</i>    | <i>PIEZO2</i>   | <i>SHOC2</i>   | <i>TRAPPC9</i> |               |
| <i>ARSE</i>     | <i>CTNNB1</i>  | <i>FUCA1</i>    | <i>KIF1A</i>    | <i>PIGA</i>     | <i>SIL1</i>    | <i>TREX1</i>   |               |
| <i>ARX</i>      | <i>CUL4B</i>   | <i>G6PD</i>     | <i>KMT2A</i>    | <i>PIGN</i>     | <i>SIN3A</i>   | <i>TRIP12</i>  |               |
| <i>ASXL1</i>    | <i>CYP2U1</i>  | <i>GABRA1</i>   | <i>KMT2B</i>    | <i>PIGV</i>     | <i>SLC13A5</i> | <i>TSC1</i>    |               |
| <i>ASXL3</i>    | <i>DDC</i>     | <i>GABRB2</i>   | <i>L1CAM</i>    | <i>PIK3CD</i>   | <i>SLC16A2</i> | <i>TSEN54</i>  |               |
| <i>ATL1</i>     | <i>DDX3X</i>   | <i>GCDH</i>     | <i>LIPH</i>     | <i>PLA2G6</i>   | <i>SLC1A2</i>  | <i>TUBA1A</i>  |               |
| <i>ATP1A2</i>   | <i>DKC1</i>    | <i>GFAP</i>     | <i>MAP2K1</i>   | <i>PLOD1</i>    | <i>SLC1A4</i>  | <i>TUBB2A</i>  |               |
| <i>ATP1A3</i>   | <i>DNM1</i>    | <i>GLRA1</i>    | <i>MBD5</i>     | <i>PLP1</i>     | <i>SLC2A1</i>  | <i>TUBB2B</i>  |               |
| <i>ATP6V0A4</i> | <i>DNM1L</i>   | <i>GNAO1</i>    | <i>MECP2</i>    | <i>PNKP</i>     | <i>SLC6A3</i>  | <i>TUBB3</i>   |               |
| <i>ATP7A</i>    | <i>DNMT3A</i>  | <i>GNAS</i>     | <i>MED12</i>    | <i>POGZ</i>     | <i>SMARCA2</i> | <i>TUBB4A</i>  |               |
| <i>ATRX</i>     | <i>DYNC1H1</i> | <i>GNB1</i>     | <i>MED13L</i>   | <i>POLG</i>     | <i>SMARCB1</i> | <i>TUSC3</i>   |               |
| <i>AUTS2</i>    | <i>DYRK1A</i>  | <i>GRIN1</i>    | <i>MEF2C</i>    | <i>POMGNT1</i>  | <i>SNAP29</i>  | <i>UBA5</i>    |               |
| <i>BCAP31</i>   | <i>EARS2</i>   | <i>GRIN2B</i>   | <i>MFN2</i>     | <i>PPM1D</i>    | <i>SON</i>     | <i>UBE3A</i>   |               |
| <i>BCL11A</i>   | <i>EBF3</i>    | <i>HACE1</i>    | <i>MICU1</i>    | <i>PRUNE1</i>   | <i>SOX2</i>    | <i>UPF3B</i>   |               |
| <i>C5orf42</i>  | <i>ECHS1</i>   | <i>HDAC8</i>    | <i>MOCS2</i>    | <i>PTPN11</i>   | <i>SPAST</i>   | <i>USP9X</i>   |               |
| <i>CACNA1A</i>  | <i>EEF1A2</i>  | <i>HECW2</i>    | <i>MTFMT</i>    | <i>PURA</i>     | <i>SPATA5</i>  | <i>WAC</i>     |               |
| <i>CACNA1G</i>  | <i>EHMT1</i>   | <i>HIST1H1E</i> | <i>MYO7A</i>    | <i>RAB3GAP1</i> | <i>SPG11</i>   | <i>WDR26</i>   |               |
| <i>CALM1</i>    | <i>EIF2B2</i>  | <i>HNRNPH2</i>  | <i>NAA10</i>    | <i>RAB3GAP2</i> | <i>SPR</i>     | <i>WDR45</i>   |               |
| <i>CAMTA1</i>   | <i>EP300</i>   | <i>HPRT1</i>    | <i>NACC1</i>    | <i>RNASEH2B</i> | <i>SPTAN1</i>  | <i>WWOX</i>    |               |

**B. Genes identified in single cases (n=143)**

|                 |                 |                 |                |               |
|-----------------|-----------------|-----------------|----------------|---------------|
| <i>ACTG1</i>    | <i>EIF2B2</i>   | <i>MED12</i>    | <i>SETBP1</i>  | <i>YY1</i>    |
| <i>AFG3L2</i>   | <i>EP300</i>    | <i>MED13L</i>   | <i>SETD2</i>   | <i>ZDHHC9</i> |
| <i>ALDH3A2</i>  | <i>EPG5</i>     | <i>MEF2C</i>    | <i>SETD5</i>   | <i>ZNF423</i> |
| <i>AP1S2</i>    | <i>ERCC6</i>    | <i>MFN2</i>     | <i>SHANK3</i>  |               |
| <i>AP4E1</i>    | <i>EZH2</i>     | <i>MOCS2</i>    | <i>SHOC2</i>   |               |
| <i>ARID1B</i>   | <i>FA2H</i>     | <i>MTFMT</i>    | <i>SIL1</i>    |               |
| <i>ARSE</i>     | <i>FARS2</i>    | <i>MYO7A</i>    | <i>SIN3A</i>   |               |
| <i>ATP1A2</i>   | <i>FBN2</i>     | <i>NACC1</i>    | <i>SLC13A5</i> |               |
| <i>ATP6V0A4</i> | <i>FGD1</i>     | <i>NALCN</i>    | <i>SLC1A2</i>  |               |
| <i>ATP7A</i>    | <i>FGF12</i>    | <i>NIPBL</i>    | <i>SLC1A4</i>  |               |
| <i>BCAP31</i>   | <i>FGFR1</i>    | <i>NKX6-2</i>   | <i>SLC6A3</i>  |               |
| <i>BCL11A</i>   | <i>FUCA1</i>    | <i>OPA1</i>     | <i>SMARCA2</i> |               |
| <i>C5orf42</i>  | <i>G6PD</i>     | <i>OPHN1</i>    | <i>SMARCB1</i> |               |
| <i>CACNA1G</i>  | <i>GABRA1</i>   | <i>OTUD6B</i>   | <i>SNAP29</i>  |               |
| <i>CALM1</i>    | <i>GCDH</i>     | <i>PDHX</i>     | <i>SOX2</i>    |               |
| <i>CDC42</i>    | <i>GFAP</i>     | <i>PEX16</i>    | <i>SPG11</i>   |               |
| <i>CDKL5</i>    | <i>GLRA1</i>    | <i>PGAP1</i>    | <i>SPR</i>     |               |
| <i>CHD2</i>     | <i>GNAS</i>     | <i>PIEZO2</i>   | <i>STAT3</i>   |               |
| <i>CHMP1A</i>   | <i>HACE1</i>    | <i>PIGA</i>     | <i>SUMF1</i>   |               |
| <i>CHRNE</i>    | <i>HDAC8</i>    | <i>PIGV</i>     | <i>TBCK</i>    |               |
| <i>CLTC</i>     | <i>HIST1H1E</i> | <i>PIK3CD</i>   | <i>TELO2</i>   |               |
| <i>CLTCL1</i>   | <i>HNRNPH2</i>  | <i>PLA2G6</i>   | <i>TOE1</i>    |               |
| <i>CTC1</i>     | <i>HPRT1</i>    | <i>PLOD1</i>    | <i>TPP1</i>    |               |
| <i>CUL4B</i>    | <i>IDS</i>      | <i>PLP1</i>     | <i>TRAPPC9</i> |               |
| <i>CYP2U1</i>   | <i>IFIH1</i>    | <i>PNKP</i>     | <i>TREX1</i>   |               |
| <i>DDC</i>      | <i>KANSL1</i>   | <i>POLG</i>     | <i>TRIP12</i>  |               |
| <i>DKC1</i>     | <i>KCNB1</i>    | <i>POMGNT1</i>  | <i>TSC1</i>    |               |
| <i>DNM1</i>     | <i>KCNC3</i>    | <i>PPM1D</i>    | <i>TSEN54</i>  |               |
| <i>DNM1L</i>    | <i>KCTD7</i>    | <i>RAB3GAP2</i> | <i>TUSC3</i>   |               |
| <i>DNMT3A</i>   | <i>KDM5C</i>    | <i>RPE65</i>    | <i>UBA5</i>    |               |
| <i>EARS2</i>    | <i>KIAA2022</i> | <i>RYR1</i>     | <i>UPF3B</i>   |               |
| <i>EBF3</i>     | <i>KIF11</i>    | <i>RYR2</i>     | <i>USP9X</i>   |               |
| <i>ECHS1</i>    | <i>KMT2B</i>    | <i>SACS</i>     | <i>WAC</i>     |               |

|               |             |                |              |  |
|---------------|-------------|----------------|--------------|--|
| <i>EEF1A2</i> | <i>LIPH</i> | <i>SCN2A</i>   | <i>WDR26</i> |  |
| <i>EHMT1</i>  | <i>MBD5</i> | <i>SEPSECS</i> | <i>WVOX</i>  |  |

**C. Genes mutated in >2 cases (n=86)**

| <b>Gene</b>    | <b>Clinical Laboratory referral cohort</b> | <b>Healthcare-based cohort</b> | <b>Total</b> |
|----------------|--------------------------------------------|--------------------------------|--------------|
| <i>ACTB</i>    | 3                                          | 0                              | 3            |
| <i>ADAR</i>    | 5                                          | 0                              | 5            |
| <i>ADCY5</i>   | 4                                          | 0                              | 4            |
| <i>ADNP</i>    | 2                                          | 0                              | 2            |
| <i>AHDC1</i>   | 3                                          | 0                              | 3            |
| <i>AP4M1</i>   | 2                                          | 0                              | 2            |
| <i>AP4S1</i>   | 2                                          | 0                              | 2            |
| <i>ARID2</i>   | 3                                          | 0                              | 3            |
| <i>ARX</i>     | 2                                          | 0                              | 2            |
| <i>ASXL1</i>   | 3                                          | 0                              | 3            |
| <i>ASXL3</i>   | 2                                          | 1                              | 3            |
| <i>ATL1</i>    | 2                                          | 2                              | 4            |
| <i>ATP1A3</i>  | 5                                          | 0                              | 5            |
| <i>ATRX</i>    | 2                                          | 0                              | 2            |
| <i>AUTS2</i>   | 3                                          | 0                              | 3            |
| <i>CACNA1A</i> | 6                                          | 0                              | 6            |
| <i>CAMTA1</i>  | 3                                          | 1                              | 4            |
| <i>CASK</i>    | 4                                          | 0                              | 4            |
| <i>CHD8</i>    | 3                                          | 0                              | 3            |
| <i>COL4A1</i>  | 7                                          | 0                              | 7            |
| <i>COL4A2</i>  | 2                                          | 0                              | 2            |
| <i>CREBBP</i>  | 2                                          | 0                              | 2            |
| <i>CTBP1</i>   | 2                                          | 0                              | 2            |
| <i>CTNNB1</i>  | 18                                         | 0                              | 18           |
| <i>DDX3X</i>   | 6                                          | 0                              | 6            |
| <i>DYNC1H1</i> | 4                                          | 0                              | 4            |
| <i>DYRK1A</i>  | 6                                          | 0                              | 6            |
| <i>ERCC8</i>   | 2                                          | 0                              | 2            |
| <i>EXOSC3</i>  | 3                                          | 0                              | 3            |



| <b>Gene</b>     | <b>Clinical Laboratory referral cohort</b> | <b>Healthcare-based cohort</b> | <b>Total</b> |
|-----------------|--------------------------------------------|--------------------------------|--------------|
| <i>FH</i>       | 2                                          | 0                              | 2            |
| <i>FOXG1</i>    | 4                                          | 0                              | 4            |
| <i>FRRS1L</i>   | 3                                          | 0                              | 3            |
| <i>GABRB2</i>   | 2                                          | 0                              | 2            |
| <i>GNAO1</i>    | 7                                          | 0                              | 7            |
| <i>GNB1</i>     | 2                                          | 0                              | 2            |
| <i>GRIN1</i>    | 3                                          | 0                              | 3            |
| <i>GRIN2B</i>   | 2                                          | 0                              | 2            |
| <i>HECW2</i>    | 2                                          | 0                              | 2            |
| <i>IQSEC2</i>   | 2                                          | 1                              | 3            |
| <i>ITPR1</i>    | 2                                          | 0                              | 2            |
| <i>KAT6A</i>    | 5                                          | 0                              | 5            |
| <i>KCNQ2</i>    | 7                                          | 0                              | 7            |
| <i>KCNT1</i>    | 3                                          | 0                              | 3            |
| <i>KIF1A</i>    | 8                                          | 0                              | 8            |
| <i>KMT2A</i>    | 4                                          | 1                              | 5            |
| <i>L1CAM</i>    | 1                                          | 1                              | 2            |
| <i>MAP2K1</i>   | 4                                          | 0                              | 4            |
| <i>MECP2</i>    | 5                                          | 2                              | 7            |
| <i>MICU1</i>    | 2                                          | 0                              | 2            |
| <i>NAA10</i>    | 3                                          | 0                              | 3            |
| <i>NGLY1</i>    | 3                                          | 0                              | 3            |
| <i>NKX2-1</i>   | 3                                          | 0                              | 3            |
| <i>PDHA1</i>    | 2                                          | 0                              | 2            |
| <i>PHIP</i>     | 2                                          | 0                              | 2            |
| <i>PIGN</i>     | 2                                          | 0                              | 2            |
| <i>POGZ</i>     | 2                                          | 0                              | 2            |
| <i>PRUNE1</i>   | 2                                          | 0                              | 2            |
| <i>PTPN11</i>   | 2                                          | 0                              | 2            |
| <i>PURA</i>     | 3                                          | 0                              | 3            |
| <i>RAB3GAP1</i> | 2                                          | 0                              | 2            |
| <i>RNASEH2B</i> | 3                                          | 0                              | 3            |
| <i>SATB2</i>    | 3                                          | 0                              | 3            |

| <b>Gene</b>    | <b>Clinical Laboratory referral cohort</b> | <b>Healthcare-based cohort</b> | <b>Total</b> |
|----------------|--------------------------------------------|--------------------------------|--------------|
| <i>SCN1A</i>   | 4                                          | 0                              | 4            |
| <i>SCN8A</i>   | 2                                          | 0                              | 2            |
| <i>SLC16A2</i> | 2                                          | 0                              | 2            |
| <i>SLC2A1</i>  | 4                                          | 1                              | 5            |
| <i>SON</i>     | 2                                          | 0                              | 2            |
| <i>SPAST</i>   | 4                                          | 0                              | 4            |
| <i>SPATA5</i>  | 4                                          | 0                              | 4            |
| <i>SPTAN1</i>  | 3                                          | 0                              | 3            |
| <i>STAMBP</i>  | 2                                          | 0                              | 2            |
| <i>STXBP1</i>  | 7                                          | 0                              | 7            |
| <i>SYNGAP1</i> | 3                                          | 0                              | 3            |
| <i>TAF1</i>    | 2                                          | 0                              | 2            |
| <i>TANGO2</i>  | 2                                          | 0                              | 2            |
| <i>TBL1XR1</i> | 2                                          | 0                              | 2            |
| <i>TCF4</i>    | 5                                          | 1                              | 6            |
| <i>TUBA1A</i>  | 5                                          | 1                              | 6            |
| <i>TUBB2A</i>  | 4                                          | 0                              | 4            |
| <i>TUBB2B</i>  | 3                                          | 0                              | 3            |
| <i>TUBB3</i>   | 4                                          | 0                              | 4            |
| <i>TUBB4A</i>  | 6                                          | 0                              | 6            |
| <i>UBE3A</i>   | 3                                          | 0                              | 3            |
| <i>WDR45</i>   | 4                                          | 0                              | 4            |
| <i>ZC4H2</i>   | 2                                          | 0                              | 2            |
| <i>ZEB2</i>    | 3                                          | 0                              | 3            |

## eReferences

1. Retterer K, Jussola J, Cho MT, et al. Clinical application of whole-exome sequencing across clinical indications. *Genet Med*. 2016;18(7):696-704.
2. Li H, Durbin R. Fast and accurate short read alignment with Burrows-Wheeler transform. *Bioinformatics*. 2009;25(14):1754-1760.
3. Li H. A statistical framework for SNP calling, mutation discovery, association mapping and population genetical parameter estimation from sequencing data. *Bioinformatics*. 2011;27(21):2987-2993.
4. Van der Auwera GA, Carneiro MO, Hartl C, et al. From FastQ data to high confidence variant calls: the Genome Analysis Toolkit best practices pipeline. *Curr Protoc Bioinformatics*. 2013;43:11 10 11-11 10 33.
5. Retterer K, Scuffins J, Schmidt D, et al. Assessing copy number from exome sequencing and exome array CGH based on CNV spectrum in a large clinical cohort. *Genet Med*. 2015;17(8):623-629.
6. Torene RI, Galens K, Liu S, et al. Mobile element insertion detection in 89,874 clinical exomes. *Genet Med*. 2020. Jan 22. doi: 10.1038/s41436-020-0749-x
7. San Lucas FA, Wang G, Scheet P, Peng B. Integrated annotation and analysis of genetic variants from next-generation sequencing studies with variant tools. *Bioinformatics*. 2012;28(3):421-422.
8. McLaren W, Gil L, Hunt SE, et al. The Ensembl Variant Effect Predictor. *Genome Biol*. 2016;17(1):122.
9. Landrum MJ, Lee JM, Riley GR, et al. ClinVar: public archive of relationships among sequence variation and human phenotype. *Nucleic Acids Res*. 2014;42(Database issue):D980-985.
10. Packer JS, Maxwell EK, O'Dushlaine C, et al. CLAMMS: a scalable algorithm for calling common and rare copy number variants from exome sequencing data. *Bioinformatics*. 2016;32(1):133-135.
11. Maxwell EK, Packer JS, O'Dushlaine C, et al. Profiling copy number variation and disease associations from 50,726 DiscovEHR Study exomes. *bioRxiv*. 2017:119461.
12. Wang K, Li M, Hadley D, et al. PennCNV: an integrated hidden Markov model designed for high-resolution copy number variation detection in whole-genome SNP genotyping data. *Genome Res*. 2007;17(11):1665-1674.
